RUNNING HEAD: Discordant genomic and phenotypic clines

TITLE: When polymorphism and monomorphism meet: discordant genomic and phenotypic clines across a lizard contact zone

AUTHORS: Caroline M. Dong<sup>1,2\*</sup>, Claire A. McLean<sup>1,2</sup>, Adam Elliott<sup>1</sup>, Adnan Moussalli<sup>2†</sup>,  
Devi Stuart-Fox<sup>1†</sup>

<sup>1</sup>School of BioSciences, The University of Melbourne, Parkville, Vic., Australia

<sup>2</sup>Sciences Department, Museums Victoria, Carlton Gardens, Vic., Australia

\*Author for correspondence

†Joint last author

CORRESPONDING AUTHOR

Caroline M. Dong

School of BioSciences, The University of Melbourne, Parkville, Victoria 3010, Australia.

E-mail: caroline.dong@unimelb.edu.au

# Abstract

Colour polymorphism can promote rapid evolution and speciation, particularly when populations differ in the number or composition of morphs. The tawny dragon, *Ctenophorus decresii*, is a compelling study system in which to examine evolutionary processes and outcomes when polymorphic and monomorphic lineages meet. The species comprises a northern lineage polymorphic for male throat coloration which lacks ultraviolet (UV) reflectance and a monomorphic southern lineage with UV-blue throats. We characterised genomic and phenotypic clines across the contact zone based on single nucleotide polymorphisms, the mitochondrial ND4 gene, and male colour traits, and concurrently assessed the phenotype of captive-bred F1 hybrids. Our results indicate that genomic introgression is asymmetric, with high frequencies of backcrossing to the northern but not southern lineage, accompanied by the prevalence of the northern mtDNA haplotype in hybrids. The clines for throat phenotype are abrupt and displaced to the south, relative to the genetic and dorsolateral phenotype clines. This suggests strong selection for the northern throat phenotype within the contact zone, particularly for the absence of ultraviolet reflectance, given the intermediate throat phenotype in captive-bred F1 hybrids. Our results demonstrate that a polymorphic sexual signal is the target of selection during incipient speciation and provide insight into the microevolutionary processes linking polymorphism and speciation.

Keywords: coloration, *Ctenophorus decresii*, introgression, speciation, reproductive isolation, ddRAD

## Introduction

Colour polymorphism, the co-existence of multiple colour morphs within a single interbreeding population (Huxley, 1955), is possibly the best studied model of discrete intraspecific phenotypic variation. Recently, there has been great interest in the role of colour polymorphism in promoting rapid phenotypic evolution and speciation, particularly when populations differ in the number, type, and frequency of morphs (Corl, Davis, Kuchta, & Sinervo, 2010; Forsman, Ahnesjö, Caesar, & Karlsson, 2008; Gray & McKinnon, 2007; Hugall & Stuart-Fox, 2012; McLean & Stuart-Fox, 2014; West-Eberhard, 1986). However, we lack detailed studies on the microevolutionary processes linking colour polymorphism and speciation. In particular, the genomic and phenotypic consequences of secondary contact between polymorphic and monomorphic lineages remain unclear, especially where the monomorphic lineage represents a novel morph.

Colour morphs often represent alternative fitness optima that differ in a suite of co-adapted morphological, physiological, behavioural, and life-history traits, which allow multiple morphs to co-exist (Maynard-Smith 1996; Sinervo and Lively 1996; reviewed in McKinnon & Pierotti, 2010). These morph-specific trait combinations are generated by correlational selection and maintained by frequency-dependent selection, which together are expected to generate tight physical genetic linkage between associated loci or favour pleiotropic loci that control the expression of multiple traits to ensure optimal combinations (Sinervo & Svensson, 2002). Accordingly, morphs are predicted to be governed by few genes of major effect and indeed this has been substantiated in a number of systems (Küpper et al., 2016; Lank, Smith, Hanotte, Burke, & Cooke, 1995; McKinnon & Pierotti, 2010; O'Neill & Beard, 2010; Sinervo, Bleay, Adamopoulou, Inervo, & Leay, 2001; Wellenreuther, Svensson, & Hansson, 2014).

Based on the widespread importance of colour signals in reproductive isolation (Boughman, 2001; Jiggins, Naisbit, Coe, & Mallet, 2001; Mavárez et al., 2006; Sætre et al., 1997; Seehausen et al., 2008) and the underlying genetic architecture of polymorphism (Sinervo & Svensson, 2002), there is expected to be a high probability of incompatibility during secondary contact between populations that differ in morph number, type, or frequency. Gene flow may result in the breakdown of adaptive genetic correlations and generate genetic incompatibilities between morphs (Pryke & Griffith, 2009). More generally, incompatibilities may arise when coadapted alleles are brought together for the first time in hybrids (Dobzhansky-Muller incompatibilities; Dobzhansky, 1937; Muller, 1942) or when coadapted nuclear and organelle (e.g. mitochondria and chloroplast) genomes that evolved in allopatry are disrupted (cytonuclear incompatibilities; Burton and Barreto 2012; Hill 2015). Further, a divergence in sexual phenotypic characteristics may also be accompanied by behavioural incompatibilities in mating preferences resulting in restricted gene flow and/or selection against hybrids. These phenotypic and genetic incompatibilities together may facilitate the process of speciation between populations which differ in morph frequencies and/or composition.

Here, we investigate the outcome of contemporary contact between colour polymorphic and monomorphic lineages of *Ctenophorus decresii* (tawny dragon; Duméril & Bibron, 1837) that differ in both morph number and type. The species comprises two phylogeographically structured lineages which differ in male dorsolateral and throat coloration (Houston 1974; McLean et al. 2014b; Figures 1 and 2a). The polymorphic northern lineage has four discrete male throat colour morphs that are present in all populations and reflect little to no ultraviolet (UV): orange, yellow, yellow with orange centre, and grey (Teasdale et al. 2013; Figure 1a). The black dorsolateral stripe is relatively straight-edged and

continuous, sometimes with one distinct blotch near the neck, and with yellow/orange coloration terminating just behind the shoulder (McLean, Moussalli, Sass, & Stuart-Fox, 2013). By contrast, southern lineage males have blue throat coloration with a strong UV reflectance peak, representing a novel morph (Figures 1b; McLean et al. 2014b). The black dorsolateral stripe is discontinuous with two distinct blotches near the neck and coloration terminating mid-body (McLean et al., 2013). The throat colour polymorphism is likely to have evolved in *C. decresii* and then was subsequently lost in the southern lineage, thereby facilitating the evolution and fixation of the novel blue morph (McLean, Stuart-Fox, et al., 2014). Genetic divergence between the northern and southern lineages (3.7% net sequence divergence in mtDNA) is consistent with range contraction to allopatric refugia during glacial-interglacial Pleistocene cycles (Byrne, 2008; McLean, Stuart-Fox, et al., 2014), where differing site-specific selective pressures may have led to the evolution of divergent phenotypes. A small number of genetically admixed individuals have been identified where the lineages meet geographically, suggesting that subsequent post-glacial range expansion has resulted in a secondary contact zone (McLean, Stuart-Fox, et al., 2014).

This is a compelling study system to explore the evolutionary consequences of secondary contact between colour polymorphic and monomorphic lineages because their biology is well-characterised. *C. decresii* is sexually dichromatic: females have cream coloured throats with a cryptic dorsal phenotype and males have bright throats with lineage-specific dorsolateral patterning and coloration. Throat and dorsolateral coloration are important intraspecific sexual signals, which are emphasised during complex movement-based territorial and courtship displays involving head-bobbing and push-ups (Gibbons, 1977, 1979; Osborne, Umbers, Backwell, & Keogh, 2012; Ramos & Peters, 2016; Stuart-Fox & Johnston, 2005). The four morphs of the northern lineage employ alternative behavioural

strategies (Yewers, Pryke, & Stuart-Fox, 2016) corresponding to differing hormonal profiles (Yewers, Jessop, & Stuart-Fox, 2017), and are associated with MHC supertypes (Hacking, Stuart-Fox, Godfrey, & Gardner, 2018). Male throat coloration develops at sexual maturity (ca. 18 months), is fixed for life, and autosomally inherited. The discrete polymorphism is likely controlled by two independently segregating loci, though the extent of orange or yellow within morphs behaves as a quantitative (polygenic) trait (Rankin, McLean, Kemp, & Stuart-Fox, 2016).

We used a method of double digest restriction-site associated DNA sequencing to identify single nucleotide polymorphisms (SNPs), sequenced the mitochondrial ND4 gene, and characterised male throat and dorsolateral phenotype across a naturally occurring contact zone between the polymorphic northern and monomorphic southern lineages. Using geographic cline analysis, we compared the frequency of these genetic and phenotypic traits along a transect through the contact zone from pure southern to pure northern populations. Furthermore, we conducted captive-breeding to investigate F1 hybrid phenotype independent of exogenous selection. Specifically, we examined i) the geographic extent of hybridisation, ii) whether contact is very recent or several generations old, iii) whether hybridisation is bidirectional or asymmetric, and iv) whether there is evidence of selection on phenotype. We predicted that selection on throat coloration to maintain the northern polymorphism should result in steeper and narrower clines compared to SNP and dorsolateral phenotype clines.

## Materials and Methods

### *Field sampling*

*Ctenophorus decresii* is a small [snout-vent-length (SVL)  $\leq 90$  mm] diurnal rock-dwelling agamid endemic to South Australia. The northern lineage occurs in the Flinders and Olary Ranges whereas the southern lineage occurs in the Mount Lofty Ranges, Fleurieu Peninsula, and on Kangaroo Island (Figure 2b). The contact zone is found in an area of relatively low-lying grassland between the rocky ranges of the parental lineages, coinciding with a change from relatively temperate to more semiarid conditions (Houston 1974; McLean et al. 2014b). Our sampling design aimed to capture the full geographic range of the species (Figure 2b, Table S1) to reaffirm previously described genetic divergence based on multi-loci sequence data and microsatellites (McLean, Stuart-Fox, et al., 2014). To extend this previous work we intensively sampled 14 sites along a north-south 160 km transect through the contact zone (Figure 2c, Table S2). As the geographic extent of hybridisation was initially unknown, the transect was anchored on either end by two genetically pure southern (sites 1 – 2) and pure northern (sites 13 – 14) populations. Lizards were captured by noosing (telescopic pole and noose made of fishing line) or by hand and released at the site of capture following data collection. A genetic sample (blood or tail tip stored in 99% ethanol at -20°C) and phenotypic data (described below) were taken from each individual. We focused on collecting data from adult males (SVL  $\geq 65$  mm) and collected genetic samples from females opportunistically. In total, our dataset comprised 234 genetic samples from across the species range (Table S1). This included 152 genetic samples and phenotypic data from up to 233 males along the contact zone transect, depending on trait (Table S2).

#### *SNP discovery*

Genomic DNA was isolated and purified from blood or tissue using either an E.Z.N.A. Tissue DNA Kit (Omega Bio-tek, Norcross, GA, USA) or a GenCatch Blood and Tissue Genomic Mini-Prep Kit (Epoch Life Sciences, Sugar Land, TX, USA). After quantification

using a QIAxpert (Qiagen), we sent between 500 and 1000 ng of DNA at a final concentration of between 50 and 100 ng/uL to Diversity Arrays Technology (Bruce, ACT, Australia) for SNP genotyping using DarTseq, a genome complexity reduction method similar to double digest restriction-site associated DNA (ddRAD) sequencing protocol. Protocols are described in detail for broad applications in Kilian et al., 2012 and specifically for the genus *Ctenophorus* in Melville et al., 2017. Briefly, genomic DNA was digested with two restriction endonucleases (PstI/HpaII), PCR amplified (1 min at 94°C; 30 cycles of 94°C for 20 s, 58°C for 30 s, 72°C for 45 s; final extension at 72°C for 7 min), and sequenced on an Illumina HiSeq2500. ‘High-density’ DarTseq SNP arrays use 2,500,000 ( $\pm 7\%$ ) reads per sample in marker calling. Two technical replicates of each DNA sample were genotyped to assess reproducibility. DarT analysis pipelines and a calling algorithm (DarTsoft14) were used to process sequences into a matrix of SNP loci. As reference genomes, we used the *C. decresii* draft genome (McLean, Stuart-Fox, and Moussalli, unpublished data) and the fully annotated central bearded dragon genome (*Pogona vitticeps*; Georges et al., 2015). In total, we obtained 172,893 SNPs from 234 individuals with 41.54% missing data. Using the R package *dartR* (v1.1.6, Gruber et al. 2018), we filtered this dataset conservatively with thresholds of 100% reproducibility,  $\leq 1\%$  missing data per locus,  $\leq 10\%$  missing data per individual, and also removed loci that deviated from Hardy-Weinberg Equilibrium ( $P < 0.05$ ). This resulted in a dataset of 1,333 SNPs from 230 individuals with 0.26% missing data.

# *Mitochondrial DNA*

We sequenced an 850 base-pair region of the mitochondrial genome which included the NADH dehydrogenase subunit four (ND4), and tRNA<sub>his</sub>, tRNA<sub>ser</sub> and tRNA<sub>leu</sub> regions using the primers ND4F (Forstner, Davis, & Arèvalo, 1995) and tRNA-Leu (Scott & Keogh, 2000) for a subset of 74 individuals from sites across the contact zone transect (Table S1).



PCR was performed in 25µL reactions containing 12.5µL GoTaq Hot Start Master Mix (Promega, Madison, Wisconsin, USA), 1µL forward and reverse primer (10µM), and 1µL DNA. Cycling conditions included an initial denaturation (95°C for 4 min) followed by 35 cycles total of denaturation (95°C for 45 s), annealing (10 and 25 cycles of 45 s at 56°C and 54°C, respectively), and extension (72°C for 1.5 min) with a final extension period of 72°C for 7 min (McLean, Stuart-Fox, et al., 2014). PCR products were submitted to the Australian Genome Research Facility (Melbourne, Victoria, AUS) for purification and forward and reverse sequencing on an Applied Biosystems 3730xl DNA Analyzer. Sequences were edited and aligned with additional ND4 sequences of northern and southern lineage *C. decresii* (McLean, Stuart-Fox, et al., 2014) in Geneious (v6.1.7; Kearse et al. 2012). Haplotype networks were constructed using the statistical parsimony algorithms of TCS (v1.21; Clement et al. 2000).

#### *Quantifying population structure and admixture*

We examined genome-wide patterns of divergence using the Bayesian model-based clustering approach implemented in STRUCTURE (v2.3.4; Pritchard, Stephens, & Donnelly, 2000). After an initial burn-in of 500,000 Markov chain Monte Carlo (MCMC) generations, we ran 500,000 generations with 10 independent replicates for K values ranging from 1 to 5 under the “admixture” model with correlated allele frequencies and prior population information, all other parameters were kept at default, and convergence of runs was visually assessed. We used STRUCTUREHARVESTER (Earl & VonHoldt, 2012) to identify the optimum value of K for our dataset and summarised results across the selected value of K using CLUMPP (v1.1.2; Jakobsson & Rosenberg, 2007). We used the Bayesian estimation of the *q*-value (proportion of an individual’s genome inherited from each parental population) with 95% confidence intervals (CI) as a hybrid index. Individuals were identified as pure

parentals or putative hybrids based on their hybrid index and 95% CI: an individual was classified as parentals if  $0.1 \geq q \geq 0.9$  or of mixed ancestry if  $0.1 < q < 0.9$ .

We used previously identified population groups within each parental lineage to further examine population structure (North: Northern Flinders Ranges [NFR], Southern Flinders Ranges [SFR], Olary Ranges [OR]; South: Mainland South [MS], Kangaroo Island [KI]; McLean et al. 2014b) and Contact Zone (CZ). We calculated expected and observed heterozygosity, the number of alleles and allelic richness, estimated population pairwise  $F_{ST}$ , and the inbreeding coefficient ( $F$ ) for each population using the R packages *dartR* (v1.1.6; Gruber et al. 2018) and *adeigenet* (v2.1.1; Jombart & Ahmed, 2011). We then performed a principal coordinate analysis (PCoA) using *dartR* to visualize pairwise genetic distances between individuals.

### *Hybrid classification*

We identified 15 diagnostic loci (fixed for alternate alleles between lineages) which had allele frequencies of  $\geq 0.90$  and  $\leq 0.1$  in parental populations using the R package *dartR* (v1.1.6, Gruber et al. 2018) for hybrid classification analysis. We used the program NEWHYBRIDS (v1.1 Anderson & Thompson, 2002) to determine the probability that individuals within the contact zone belonged to one of the six genotypic classes resulting from the first two generations of hybridisation: parental forms (P1 and P2), F1 ( $P1 \times P2$ ), F2 ( $F1 \times F1$ ), and backcrossed ( $F1 \times P1/P2$ ). A total of 500,000 MCMC generations were run after an initial burn-in of 100,000 generations with uniform priors for alleles and mixing proportions. We ran this analysis five times and averaged probabilities across runs. Although it is not always possible to unambiguously assign individuals into discrete classes due to the continuum that may be found in wild populations, classification may be suggestive of

situations where contact is very recent or where F1 hybrids are infertile based on the absence of F2 hybrids and backcrosses, or where contact is several generations old based on the absence of pure parentals and F1 hybrids.

# *Captive-breeding and testosterone-induced expression of colour traits*

To evaluate F1 hybrid phenotype independent of extrinsic selection pressures, we conducted captive breeding using 36 pure southern lineage individuals (female = 17, male = 19) collected from cline site 1 (southernmost site, longitude: 139.103°, latitude: -33.443°) and 41 pure northern lineage individuals (female = 20, male = 21) from cline site 14 (northernmost site, longitude: 139.103°, latitude: -33.443°; Table S2, Figure 2c) to produce reciprocal cross hybrids, in addition to pure lineage offspring for comparison. Male and female pairs were housed together until the female was visibly gravid, eggs were collected following oviposition and incubated until hatching. Offspring were housed individually and reared under laboratory conditions (total = 138; southern = 11, northern = 54, hybrids = 73). We genotyped adults and offspring at five microsatellite loci (Am41, Cp10, Ctde45, Ctde05, Ctde12; Schwartz et al. 2007; McLean et al. 2014b) and confirmed paternity using a maximum likelihood approach in CERVUS (v3.0.7; Kalinowski, Taper, & Marshall, 2007; Marshall, Slate, Kruuk, & Pemberton, 1998). For all offspring, we induced throat colour expression by artificially elevating testosterone levels at nine months of age in both sexes (female = 64, male = 74; supplemental information). Females can be induced to express discrete throat morphs found in males using testosterone (Rankin & Stuart-Fox, 2015), but dorsolateral patterning and coloration remain cryptic therefore dorsolateral phenotype was analysed only for male offspring. See supplemental information for full details of breeding, rearing, genotyping, and throat colour expression procedures.

## *Analysis of phenotypic data*

To characterise the phenotype of wild-caught males and captive-bred F1 hybrids, we took standardised ventral (i.e. throat) and dorsal photographs and spectral reflectance measurements of throat colours. Photographs were taken using a Canon EOS 600D digital camera, saved in raw format, and included an Xrite colour standard and ruler for scale (Stevens, Párraga, Cuthill, Partridge, & Troscianko, 2007). Images were converted to 8-bit tiff files using Digital Photo Professional (v4.5.0.0; Canon Inc.), linearised with respect to radiance, and equalised against a grey standard (Stevens et al. 2007; as per Smith et al. 2016). We then performed a segmentation analysis (detailed in Teasdale et al., 2013) to extract the proportion of each colour present on the throat (i.e. orange, yellow, blue), classify throats into existing morphs (orange, yellow, orange-yellow, grey, or blue), and to quantify the proportion of orange and yellow colouration present on the head and neck from dorsal photographs. Image analysis was conducted using custom code written in MATLAB (The MathWorks, Inc., Natick, MA, USA; see Teasdale et al., 2013). We also manually quantified the number of distinct breaks in the dorsolateral stripe near the neck by visually inspecting all photographs of the dorsal region.

We took spectral reflectance measurements (300 – 700 nm) to quantify variation in UV reflectance, using an Ocean Optics (Dunedin, FL, USA) Jaz portable spectrometer. The probe was held at a constant angle (45°) and distance from the surface of the skin. Measurements were expressed relative to a Spectralon 99% diffuse white reflectance standard (Labsphere, Inc., North Sutton, NH, USA). At least two measurements were taken of each colour present on the throat, then averaged. For each throat colour patch, we estimated the receptor quantum catch (QC), the stimulation of retinal photoreceptors, for the violet to UV wavelength sensitive (UVS) photoreceptor because we were specifically interested in the

diagnostic UV-blue component of throat coloration. The R package *pavo* (v1.3.1; Maia, Gruson, Endler, & White, 2018) was used to process reflectance measurements.

We performed principal component analyses (PCA) to explore variation in throat coloration variables (proportion of orange, proportion of yellow, proportion of blue) and dorsolateral phenotype variables (proportion orange, proportion of yellow, breaks in the dorsolateral stripe) in the R package *FactoMineR* (v1.4.1; Le, Josse, & Husson, 2008). In each, the lineages were differentiated along the first dimension (PC1) and this was used to collapse variables into a single measure of overall phenotype and retained for use in subsequent cline analyses. The quantum catch of the UV sensitive photoreceptor (QC<sub>UVS</sub>) was used singly in cline analyses to assess its frequency across the contact zone independent of throat colour morph. Due to missing data, 204 individuals were used in throat phenotype analyses whereas 233 individuals were used in dorsolateral phenotype analyses. Linear discriminant analyses were performed on pure individuals in the R package *MASS* (v7.3.50; Ripley, 2002) using all throat phenotype variables (proportion of orange, yellow, and blue, and QC<sub>UVS</sub>) and dorsolateral phenotype variables as independent variables.

### *Geographic cline analysis*

We used the R package *HZAR* (v0.2-5, Derryberry, Derryberry, Maley, & Brumfield, 2014) to fit a series of equilibrium geographic cline models (Gay, Crochet, Bell, & Lenormand, 2008; Szymura & Barton, 1986; Szymura & Barton, 1991) to both the molecular and phenotypic datasets, and in all cases using 1,000,000 MCMC generations following an initial burn-in of 100,000 generations. Specifically, we estimated cline models for the hybrid index (H<sub>Index</sub>; Bayesian *q*-value based on 1,333 loci), mtDNA haplotype frequencies, quantum

catch of the UV wavelength sensitive receptor ( $QC_{UVS}$ ), PC1 for throat coloration ( $TPC1$ ), and PC1 for dorsolateral phenotype ( $D_{PC1}$ ).

*HZAR* uses logistic regression equations to fit sigmoidal clines in a maximum-likelihood framework and describes cline centre ( $c$ ) as the position where estimated trait frequency is 0.5 and width ( $w$ ) as  $1/\text{slope}$  at the cline centre. For molecular clines, we compared 15 models that varied in the fitting of trait interval ( $p$ ; minimum and maximum frequencies at tails; fixed at 0 and 1, observed values, estimated values) and exponential decay tails (none, right only, left only, mirrored, both estimated separately). These 15 models were compared to an additional null model. For phenotypic trait data we compared models that varied in the fitting of exponential decay tails (none, right only, left only, mirrored, both estimated separately) and estimated mean and variance on the ends and in the centre. All models estimated cline centre and width as well as tail parameters if applicable ( $\delta$ , distance from the centre to the tail;  $\tau$ , tail slope).  $QC_{UVS}$  and  $TPC1$  were normalised to values between 0 and 1 for plotting purposes.

To address model selection uncertainty, we conducted model averaging in an Akaike's information criterion (AIC) framework. We calculated the Akaike weight ( $AIC_w$ ), a value between 0 and 1 which can be interpreted as the probability of being the best approximating model (Burnham & Anderson, 2002). Models were then ranked by  $AIC_w$  downwards until the cumulative  $AIC_w$  reached 0.95 to attain a 95% confidence set of best-ranked models (Lukacs, Burnham, & Anderson, 2010; Symonds & Moussalli, 2011). We recalculated the  $AIC_w$  of models in the 95% confidence set and used those to calculate the model-averaged estimate of parameters (e.g. centre and width). We produced model-averaged clines by first multiplying the estimate for a given distance interval by the  $AIC_w$ . This was done for each model within the 95% confident set of models. The AIC model averaged estimate was then obtained by

summing up weighted estimates for each distance interval. Similarly, we multiplied the minimum and maximum estimate bounds by the AIC<sub>w</sub>, followed by summation to represent the credible region. Finally, the coincidence of cline centres was assessed by comparing model-averaged maximum-likelihood derived CIs (two log-likelihood unit support limits) of cline centres, with non-overlapping CIs considered statistically supported differences. Akaike weights were calculated using the R package *MuMIn* (v1.43.6; Bartoń 2018).

## Results

### *Population structure and admixture*

We found distinct population structure across the species range with the most prominent divide between the northern and southern lineages and evidence for the presence of hybrids in the contact zone. Based on the STRUCTURE analysis, only two clusters were identified, corresponding to the major split between the northern and southern lineages (Figure 2d, Table S3). The  $q$ -values ranged from 0.999 (pure southern) to 0.001 (pure northern). Across the contact zone transect, individuals from the southernmost sites 1 – 2 had a high probability of belonging to the southern genetic cluster ( $q \geq 0.90$ ; mean  $\pm$  SD =  $0.99 \pm 0.02$ ) with the exception of two admixed individuals ( $q = 0.81$  and  $0.57$ ). All individuals from the northernmost sites 9 – 14 had a high probability of belonging to the northern genetic cluster ( $q \leq 0.10$ ; mean  $\pm$  SD =  $0.04 \pm 0.03$ ). Hybrids were identified within sites 3 – 8 where all individuals were of mixed ancestry and exhibited a highly skewed continuum of  $q$ -values ranging from 0.53 to 0.11. These sites will hereinafter be referred to as ‘the contact zone’, encompassing a distance of approximately 22.5 km. We also identified a density trough of approximately 12 km between sites 2 and 3 (Figures 2c–d) across which the genotype changes

abruptly and multi-year surveys recovered no individuals. With the exception of two individuals at site 3, all admixed individuals in sites 3 – 13 had northern lineage mtDNA haplotypes. The southern lineage mtDNA haplotype was fixed in sites 1 – 2, including the only two admixed individuals identified in the geographic range of the southern lineage (Figure S1).

The first axis of the PCoA constructed from 1,333 loci clustered all populations into two major groups corresponding to the northern and southern lineage (variance explained = 19.4%; Figure 3). We found evidence for the presence of hybrids along this axis, with hybrids clustered more closely to northern lineage Olary Ranges (OR) population. Population pairwise measures of  $F_{ST}$  between the contact zone and northern lineage OR/SFR/NFR populations ( $F_{ST}$  range: 0.058 – 0.216; Table S4) were lower relative to measures of  $F_{ST}$  between the contact zone and southern lineage MS/KI populations ( $F_{ST}$  range: 0.203 – 0.293). The contact zone had the lowest inbreeding coefficient ( $F = 0.095$ ) and the highest level of heterozygosity ( $H_{exp} = 0.084$ ,  $H_{obs} = 0.079$ ) relative to parental populations, with very similar allelic number and richness to the OR population (Table 1). The second PCoA axis (variance explained = 3.5%) showed population structure within each lineage, with the Northern Flinders Ranges (NFR) and Kangaroo Island (KI) populations showing differentiation from other populations of their respective lineages ( $F_{ST} = 0.571$ ). This can likely be attributed to the fact that each represents the northernmost and southernmost populations of their lineages, and KI is an insular population.

### *Hybrid classification*

We found a strong bias in genetic introgression with admixed individuals being predominantly backcrossed with the northern lineage. Of individuals within the contact zone,



35% had intermediate  $q$ -values ( $0.4 < q < 0.6$ ) and a large proportion (65%) had  $q$ -values between 0.39 and 0.10 suggestive of backcrossing. We found fewer individuals with intermediate  $q$ -values using diagnostic loci (13.75%) with a larger proportion of backcrossed individuals (86.25%). NEWHYBRIDS classified 88.75% of individuals in the contact zone to one of the six classes with a posterior probability (PP) of  $\geq 75\%$ . Additionally, 18.75% of individuals were classified as pure northern (P1), 22.5% as F2 hybrids, and 47.5% as backcrosses to the northern lineage (B1). We did not recover any F1 hybrids and posterior probabilities of individuals being classified as backcrosses to the southern lineage were uniformly low (PP  $\leq 13.31\%$ ). Of the two admixed individuals found in the geographic range of the southern lineage, one was classified as F2 and the other was unable to be classified (PP  $\leq 75\%$ ). Individuals unable to be confidently classified likely represent the continuum present in wild populations, unsuited for discrete classification, and difficult to distinguish even with many diagnostic markers (Boecklen & Howard, 1997; Vähä & Primmer, 2006).

# *Hybrid throat and dorsolateral phenotypes*

The throat phenotype of wild-caught hybrid males was more similar to that of the northern lineage, exhibiting all four northern throat colour morphs with uniformly low levels of UV reflectance. Linear discriminant analyses (LDA) on throat variables showed the northern and southern lineages strongly differentiated along LD1 which was driven primarily by the proportion of blue and secondarily by  $QC_{UVS}$  and the proportion of orange (variance explained = 99.8%; Figure 4a, Table S5). The 95% confidence ellipses drawn for the throat phenotypes of northern and hybrid males overlapped each other. The large majority of hybrid throats cluster with northern throats. Blue coloration was not detected on the throats of pure northern males. A degree of blue coloration ( $\geq 5\%$  blue pixels in segmentation analysis), however, was found on a portion of hybrid throats of each morph: grey (47.4%,  $N = 19$ ),

orange (5.2%, N = 39), orange-yellow (6.7%, N = 15), yellow (11.8%, N = 17; Figure 5a).

The throat phenotype of the two hybrid individuals found in the range of the southern lineage had larger proportions of blue coloration on the throat relative to other hybrids.

In contrast to wild-caught hybrid throats, captive-bred F1 hybrid throat phenotype was more intermediate and exhibited a wide range of UV reflectance levels varying from those characteristic of the northern to southern lineages. Linear discriminant analysis on throat variables of captive-bred F1 hybrids showed strong differentiation between lineages along LD1 driven primarily by  $QC_{UVS}$  and secondarily by the proportions of blue and yellow (variance explained = 88.0%; Figure 4b, Table S5). The 95% confidence ellipse drawn for hybrid throats overlaps those of both northern and southern throats to a similar extent. Results were essentially unchanged when considering hybrids sired by a northern or southern male and by offspring sex. Similar to wild hybrids, all four northern throat colour morphs were recovered in captive-bred hybrids, and all but the orange-yellow morph had a proportion of individuals with a blue component: grey (32.3%, N = 31), orange (18.5%, N = 27), orange-yellow (0%, N = 2), yellow (8.3%, N = 12; Figure 5b). Although the artificial elevation of testosterone levels has been shown to induce the expression of northern throat colour morphs in juveniles and females (Rankin et al., 2016; Rankin & Stuart-Fox, 2015), we found that it did not comparably induce the expression of the blue throat colour morph in all pure southern offspring. Therefore, the presence of blue coloration on F1 hybrid offspring throats may have been underestimated.

Dorsolateral phenotype in both wild-caught and captive-bred hybrids is intermediate between the lineages (Figures 4c–d). Within the contact zone, differentiation between lineages along LD1 is driven primarily by the number of breaks in the dorsolateral stripe and proportion of orange (Table S5). The 95% confidence ellipses drawn for the dorsolateral

phenotypes of hybrids and northern males overlap incompletely, likely reflecting the high frequencies of backcrossing to the northern lineage. In captive-bred hybrids, comparable results were found with differentiation driven by breaks in the lateral stripe (Table S5) and the 95% confidence ellipse for hybrid dorsolateral phenotype overlaps those of both northern and southern dorsolateral phenotypes.

### *Geographic clines*

Model-averaged clines for mtDNA and throat phenotype ( $QC_{UVS}$  and  $T_{PC1}$ ) exhibited relatively narrower clines with abrupt transitions suggesting selection on these traits, compared to clines for the hybrid index ( $H_{Index}$ ) and dorsolateral phenotype ( $D_{PC1}$ ; Table 2). The best-fitting clines for the hybrid index and mtDNA had coincident centres with overlapping CIs but showed discordance in slope where the mtDNA cline was significantly narrower ( $H_{Index}$ :  $c = 28.41$  km,  $w = 29.77$  km; mtDNA:  $c = 27.78$  km,  $w = 0.64$  km; Figure 6a–b). The cline fitted for the dorsolateral phenotype ( $c = 23.02$  km,  $w = 13.97$ ) was coincident with that of the hybrid index (Figure 6c). Clines for throat phenotype ( $QC_{UVS}$  and  $T_{PC1}$ ) were similar in centre and width to each other ( $QC_{UVS}$ :  $c = 15.90$  km,  $w = 8.48$  km;  $T_{PC1}$ :  $c = 15.38$  km,  $w = 3.22$  km; Figure 6d), their centres were displaced by 12.51 and 13.03 km to the south from the hybrid index cline centre and do not have overlapping CIs with the hybrid index cline. See Table S6 for full details of cline models in the AIC 95% confidence set for each trait.

## **Discussion**

Evaluating the evolutionary outcomes of secondary contact between lineages that differ in morph composition can provide valuable insights into the role of polymorphism in

speciation. We characterised genomic and phenotypic patterns across the contact zone between colour polymorphic and monomorphic lineages of *C. decresii* and concurrently measured the phenotype of captive-bred F1 hybrids. We found that the contact zone is geographically narrow and appears to be several generations old with no parental forms or F1 hybrids present in the genetic centre. Further, we found evidence of asymmetric genomic introgression with hybrid backcrossing almost exclusively to the northern lineage, which suggests that hybridisation between the lineages is not ongoing. This, accompanied by the prevalence of the northern lineage mtDNA haplotype across the contact zone, suggests differing levels of selection against particular recombinants. Dorsolateral phenotype across the contact zone appeared to be the result of genetic admixture whereas there was evidence of selection for the northern throat polymorphism within the contact zone. We found all four northern throat morphs present with low UV reflectance in wild-caught hybrids, contrasting with highly variable and intermediate levels of UV reflectance in captive-bred hybrids.

Multiple lines of evidence suggest reproductive incompatibilities between the divergent lineages of *C. decresii*. We found a geographically narrow area of admixture relative to the parental ranges, with hybrids backcrossing almost exclusively to the northern lineage. The restricted gene flow to the southern lineage is associated with an approximately 12 km density trough (Figures 3b–c) where it appears that *C. decresii* populations either occur in levels below human detection or do not currently exist despite continuous rocky habitat with no obvious barriers to dispersal. Our findings suggest that the density trough is a result of intrinsic genomic incompatibilities rather than extrinsic factors preventing dispersal and backcrossing to the southern lineage. The narrower and more abrupt transition exhibited by the mtDNA cline relative to the hybrid index and the rarity of admixed individuals containing the southern mtDNA haplotype provide further evidence of selection against particular

recombinants across the contact zone. Captive breeding experiments show no significant prezygotic barriers to the formation of F1 hybrids with either parental mtDNA haplotype (Dong, Rankin, McLean, & Stuart-Fox, unpublished data), although their reproductive viability is unknown. However, stronger incompatibilities and hybrid breakdown are more frequently seen in F2 and later generation hybrids during the early stages of divergence. This has been described extensively for both Dobzhansky-Muller incompatibilities (reviewed in Coyne & Orr, 2004) and for cytonuclear incompatibilities (Ellison & Burton, 2008; Fishman & Willis, 2006; Meiklejohn et al., 2013; Niehuis, Judson, & Gadau, 2008). Ultimately, backcrossing to the southern lineage, regardless of mtDNA haplotype, may result in offspring that are inviable, infertile, or suffer greatly reduced fitness.

We found evidence that the northern throat phenotype is selectively favoured within the contact zone, in terms of both discrete throat morphs and UV reflectance. Although throat and dorsolateral coloration are both sexually dichromatic traits, the throat phenotype clines were both displaced to the southern end of the contact zone, with the northern throat phenotype prevalent in hybrids. By contrast, the dorsolateral coloration cline was more concordant with the genetic cline. Selection has been shown to drive the rapid spread of an advantageous trait/phenotype across contact zones, and in some cases into the other parental lineage (Baldassarre, White, Karubian, & Webster, 2014; Pardo-Diaz et al., 2012; Stein & Uy, 2006; While et al., 2015). We did not detect the loss of any northern throat morphs across the contact zone or in F1 hybrids, indicating that co-adapted trait complexes of the northern polymorphism are stable despite genetic disruption. Although hybrid throats were objectively and confidently classified into discrete northern throat morphs, we observed a proportion of each morph which exhibited a degree of intermediate nature where an area of blue coloration was present. There was a notably higher proportion of grey morphs which had blue coloration

present. This may be due to the similar mechanism by which grey and blue skin are produced in *C. decresii*, both from melanin pigments in melanophores with blue skin incorporating an additional structural component produced from guanine crystals in iridophores (McLean, Lutz, Rankin, Stuart-Fox, & Moussalli, 2017). Nevertheless, we did not detect any hybrid throats that exhibited a true southern throat phenotype with both predominantly blue throat coloration and a high level of UV reflectance. This, in addition to the wide range of UV reflectance found in captive-bred F1 hybrids, points toward the uncoupling of blue coloration and UV reflectance in hybrids driven by stronger negative sexual selection against UV reflectance as a singular trait.

Selection for the northern throat polymorphism could be driven by mating behaviour which evolved via reinforcement and/or microhabitat characteristics. Mate preference trials with captive *C. decresii* predict a greater frequency of mating between southern females with northern males than the reciprocal combination (McLean, Bartle, Dong, Rankin, & Stuart-Fox, submitted). This contrasts with patterns observed within the contact zone, indicating that prezygotic barriers between lineages have not evolved in allopatry. However, prezygotic barriers are expected to form in the contact zone because postzygotic barriers (inferred from low frequency of hybrids backcrossed to the south) should select for the formation of prezygotic barriers to prevent maladaptive hybridisation (i.e. reinforcement). Extrinsic factors could also contribute to the northern throat phenotype having a competitive advantage in the contact zone, for example, due to a relatively higher conspicuousness to conspecifics. Throat coloration of each lineage is more conspicuous against the predominant background colours of native lichen in their respective ranges (McLean, Moussalli, & Stuart-Fox, 2014). Within the contact zone, lichen coloration is similar to that found in the range of the northern lineage, predominantly pale green. Therefore, sexual selection may operate through male-male

interactions or female choice to result in a reproductive advantage of the northern throat phenotype as a more conspicuous and detectable visual signal. In contrast, the dorsolateral phenotype cline indicates that it is not under similarly strong selection and appears to play a lesser role in reproductive isolation in sympatry. Male dorsolateral coloration may be constrained as it is under both sexual and natural selection because of its dual function as a intraspecific signal and in minimising conspicuousness to predators against native lichen (McLean, Moussalli, et al., 2014; Ramos & Peters, 2016).

# *Conclusions*

In summary, our data indicate that sexual signal divergence and intrinsic genetic incompatibilities play an important role in restricting gene flow between polymorphic and monomorphic lineages of *C. decresii*. Our results suggest that the reciprocally monophyletic lineages remain distinct in the face of gene flow with evidence of isolating barriers. Thus, consideration should be given towards elevating the lineages to species status based on genetic and phenotypic divergence with restricted gene flow. Our findings also demonstrate that a polymorphic sexual signal is the target of selection during incipient speciation. The stability of the northern polymorphism despite genetic disruption is consistent with the theoretical genetic architecture of colour polymorphism and correlated traits, namely control by pleiotropic or tightly linked genes. Taken together, these results are consistent with the view that polymorphism can promote speciation.

## Acknowledgements

This study was funded by the Australian Research Council (grant nos. DP150101048 and DP1092908) to D.S-F., the Holsworth Wildlife Endowment to C.M.D. and C.A.M., Alfred Nicholas Fellowship and Nature Foundation South Australia to C.A.M. We thank Madeleine Yewers, Steven Mesis, and Jessica Borgh for assistance in the field; Katrina Rankin for assistance with captive animal husbandry; Anne Auslebrook for assistance with image analysis; private landowners for kindly allowing access to their property for field sampling; and South Australian Museum for providing tissue samples. Ben Phillips provided constructive comments on an earlier draft. Data collection was conducted with permits from the Department of Environment, Water and Natural Resources, South Australia (permit nos. E25861-1 and Q26428-3), the Department of Environment, Land, Water and Planning, Victoria (permit nos. 10007000 and 10007751) and with approval by the University of Melbourne Animals Ethics Committee (approval nos. 1011760.1 and 1413220.4), the Wildlife Ethics Committee of South Australia (approval nos. 18/2010 and 25/2015).

## Author Contributions

All authors contributed to study design and field sampling. C.M.D. and C.A.M. performed laboratory work. C.M.D. conducted data analyses and drafted the manuscript, C.A.M, A.M. and D.S-F provided input on analyses and interpretation. All authors read and approved the final manuscript.



## References

- Anderson, E. C., & Thompson, E. A. (2002). A model-based method for identifying species hybrids using multilocus genetic data. *Genetics*, 160(3), 1217–1229.
- Baldassarre, D. T., White, T. A., Karubian, J., & Webster, M. S. (2014). Genomic and morphological analysis of a semipermeable avian hybrid zone suggests asymmetrical introgression of a sexual signal. *Evolution*, 68(9), 2644–2657. doi:10.1111/evo.12457
- Bartoń, K. (2018). MuMIn: Multi-Model Inference. R package version 1.42.1. <https://CRAN.R-project.org/package=MuMIn>.
- Boecklen, W. J., & Howard, D. J. (1997). Genetic analysis of hybrid zones: numbers of markers and power of resolution. *Ecology*, 78(8), 2611–2616. doi:10.1890/0012-9658(1997)078[2611:gaohzn]2.0.CO;2
- Boughman, J. W. (2001). Divergent sexual selection enhances reproductive isolation in sticklebacks. *Nature*, 411(6840), 944–948. doi:10.1038/35082064
- Burnham, K., & Anderson, D. (2002). *Model selection and multimodel inference* (2nd ed.). New York: Springer.
- Burton, R. S., & Barreto, F. S. (2012). A disproportionate role for mtDNA in Dobzhansky-Muller incompatibilities? *Molecular Ecology*, 21(20), 4942–4957. doi:10.1111/mec.12006
- Byrne, M. (2008). Evidence for multiple refugia at different time scales during Pleistocene climatic oscillations in southern Australia inferred from phylogeography. *Quaternary Science Reviews*, 27, 2576–2585. doi:10.1016/j.quascirev.2008.08.032
- Clement, M., Posada, D., & Crandall, K. A. (2000). TCS: a computer program to estimate gene genealogies. *Molecular Ecology*, 9(10), 1657–1659. doi:10.1046/j.1365-294x.2000.01020.x
- Corl, A., Davis, A. R., Kuchta, S. R., & Sinervo, B. (2010). Selective loss of polymorphic mating types is associated with rapid phenotypic evolution during morphic speciation. *Proceedings of the National Academy of Sciences*, 107(9), 4254–4259. doi:10.1073/pnas.0909480107
- Coyne, J. A., & Orr, H. A. (2004). *Speciation*. Sinauer Associates. Sunderland, Massachusetts: Sinauer Associates.
- Derryberry, E. P., Derryberry, G. E., Maley, J. M., & Brumfield, R. T. (2014). HZAR: hybrid zone analysis using an R software package. *Molecular Ecology Resources*, 14(3), 652–663. doi:10.1111/1755-0998.12209
- Dobzhansky, T. (1937). *Genetics the Origin and of Species. Genetics and the origin of species*. New York: Columbia University Press.
- Earl, D. A., & VonHoldt, B. M. (2012). STRUCTURE HARVESTER: a website and program for visualizing STRUCTURE output and implementing the Evanno method. *Conservation Genetics Resources*, 4(2), 359–360. doi:10.1007/s12686-011-9548-7
- Ellison, C. K., & Burton, R. S. (2008). Interpopulation hybrid breakdown maps to the

- mitochondrial genome. *Evolution*, 62(3), 631–638. doi:10.1111/j.1558-5646.2007.00305.x
- Fishman, L., & Willis, J. H. (2006). A cytonuclear incompatibility causes anther sterility in *Mimulus* hybrids. *Evolution*, 60(7), 1372–1381. doi:10.1554/05-708.1
- Forsman, A., Ahnesjö, J., Caesar, S., & Karlsson, M. (2008). A model of ecological and evolutionary consequences of color polymorphism. *Ecology*, 89(1), 34–40. doi:10.1890/07-0572.1
- Forstner, M. R., Davis, S. K., & Arèvalo, E. (1995). Support for the hypothesis of anguimorph ancestry for the suborder Serpentes from phylogenetic analysis of mitochondrial DNA sequences. *Molecular Phylogenetics and Evolution*, 4(1), 93–102. doi:10.1006/mpev.1995.1010
- Gay, L., Crochet, P. A., Bell, D. A., & Lenormand, T. (2008). Comparing clines on molecular and phenotypic traits in hybrid zones: A window on tension zone models. *Evolution*, 62(11), 2789–2806. doi:10.1111/j.1558-5646.2008.00491.x
- Georges, A., Li, Q., Lian, J., O’Meally, D., Deakin, J., Wang, Z., ... Zhang, G. (2015). High-coverage sequencing and annotated assembly of the genome of the Australian dragon lizard *Pogona vitticeps*. *GigaScience*, 4(1), 45. doi:10.1186/s13742-015-0085-2
- Gibbons, J. R. H. (1977). *Comparative ecology and behaviour of lizards of the Amphibolurus decresii species complex*. PhD dissertation. The University of Adelaide.
- Gibbons, J. R. H. (1979). The hind leg pushup display of the *Amphibolurus decresii* species complex (Lacertilia: Agamidae). *Copeia*, 1, 29–40. doi:10.2307/1443725
- Gray, S. M., & McKinnon, J. S. (2007). Linking color polymorphism maintenance and speciation. *Trends in Ecology & Evolution*, 22(2), 71–79. doi:10.1016/j.tree.2006.10.005
- Gruber, B., Unmack, P. J., Berry, O. F., & Georges, A. (2018). dartR: An R package to facilitate analysis of SNP data generated from reduced representation genome sequencing. *Molecular Ecology Resources*, 18, 691–699. doi:10.1111/1755-0998.12745
- Hacking, J. D., Stuart-Fox, D., Godfrey, S. S., & Gardner, M. G. (2018). Specific MHC class I supertype associated with parasite infection and color morph in a wild lizard population. *Ecology and Evolution*, 8(19), 9920–9933. doi:10.1002/ece3.4479
- Hill, G. E. (2015). Mitonuclear ecology. *Molecular Biology and Evolution*, 32(8), 1917–1927. doi:10.1093/molbev/msv104
- Houston, T. F. (1974). Revision of the *Amphibolurus decresii* complex (Lacertilia: Agamidae) of South Australia. *Transactions of The Royal Society of South Australia*, 98(2), 49–60. doi:10.1126/science.97.2526.482-a
- Hugall, A. F., & Stuart-Fox, D. (2012). Accelerated speciation in colour-polymorphic birds. *Nature*, 485, 631–634. doi:10.1038/nature11050
- Huxley, J. (1955). Morphism in birds. *Acta International Congress Ornithology XI*, 309–328.
- Jakobsson, M., & Rosenberg, N. A. (2007). CLUMPP: A cluster matching and permutation program for dealing with label switching and multimodality in analysis of population

631 structure. *Bioinformatics*, 23(14), 1801–1806. doi:10.1093/bioinformatics/btm233

632 Jiggins, C. D., Naisbit, R. E., Coe, R. L., & Mallet, J. (2001). Reproductive isolation caused  
633 by colour pattern mimicry. *Nature*, 411(6835), 302–305. doi:10.1038/35077075

634 Jombart, T., & Ahmed, I. (2011). adegenet 1.3-1: New tools for the analysis of genome-wide  
635 SNP data. *Bioinformatics*, 27(21), 3070–3071. doi:10.1093/bioinformatics/btr521

636 Kalinowski, S. T., Taper, M. L., & Marshall, T. C. (2007). Revising how the computer  
637 program CERVUS accommodates genotyping error increases success in paternity  
638 assignment. *Molecular Ecology*, 16(5), 1099–1106. doi:10.1111/j.1365-  
639 294X.2007.03089.x

640 Kearse, M., Moir, R., Wilson, A., Stones-havas, S., Sturrock, S., Buxton, S., ... Drummond,  
641 A. (2012). Geneious Basic: An integrated and extendable desktop software platform for  
642 the organization and analysis of sequence data. *Bioinformatics*, 28(12), 1647–1649.  
643 doi:10.1093/bioinformatics/bts199

644 Kilian, A., Wenzl, P., Huttner, E., Carling, J., Xia, L., Caig, V., ... Uszynski, G. (2012).  
645 Diversity Arrays Technology: A Generic Genome Profiling Technology on Open  
646 Platforms. In F. Pompanon & A. Bonin (Eds.), *Data Production and Analysis in  
647 Population Genomics. Methods in Molecular Biology (Methods and Protocols)* (Vol.  
648 888, pp. 67–89). Totowa, NJ: Humana Press. doi:10.1007/978-1-61779-870-2

649 Küpper, C., Stocks, M., Risse, J. E., Dos Remedios, N., Farrell, L. L., McRae, S. B., ...  
650 Burke, T. (2016). A supergene determines highly divergent male reproductive morphs in  
651 the ruff. *Nature Genetics*, 48(1), 79–83. doi:10.1038/ng.3443

652 Lank, D. B., Smith, C. M., Hanotte, O., Burke, T., & Cooke, F. (1995). Genetic  
653 polymorphism for alternative mating behaviour in lekking male ruff *Philomachus*  
654 *pugnax*. *Nature*, 378(2), 59–62. doi:10.1038/378059a0

655 Lê, S., Josse, J., & Husson, F. (2008). FactoMineR: An R Package for Multivariate Analysis.  
656 *Journal of Statistical Software*, 25(1), 1–18. doi:10.1016/j.envint.2008.06.007

657 Lukacs, P. M., Burnham, K. P., & Anderson, D. R. (2010). Model selection bias and  
658 Freedman’s paradox. *Annals of the Institute of Statistical Mathematics*, 62(1), 117–125.  
659 doi:10.1007/s10463-009-0234-4

660 Maia, R., Gruson, H., Endler, J. A., & White, T. E. (2019). PAVO 2: New tools for the  
661 spectral and spatial analysis of colour in R. *Methods in Ecology and Evolution*, 10(7),  
662 1097–1107. doi:10.1111/2041-210X.13174

663 Marshall, T. C., Slate, J., Kruuk, L. E. B., & Pemberton, J. M. (1998). Statistical confidence  
664 for likelihood-based paternity inference in natural populations. *Molecular Ecology*, 7,  
665 639–655.

666 Mavárez, J., Salazar, C. A., Bermingham, E., Salcedo, C., Jiggins, C. D., & Linares, M.  
667 (2006). Speciation by hybridization in *Heliconius* butterflies. *Nature*, 441(7095), 868–  
668 871. doi:10.1038/nature04738

669 Maynard-Smith, J. (1996). Sympatric speciation. *The American Naturalist*, 916, 637–650.

670 McKinnon, J. S., & Pierotti, M. E. R. (2010). Colour polymorphism and correlated characters:

671 genetic mechanisms and evolution. *Molecular Ecology*, 19(23), 5101–5125.  
672 doi:10.1111/j.1365-294X.2010.04846.x

673 McLean, C. A., Lutz, A., Rankin, K. J., Stuart-Fox, D., & Moussalli, A. (2017). Revealing the  
674 biochemical and genetic basis of color variation in a polymorphic lizard. *Molecular*  
675 *Biology and Evolution*, 34(8), 1924–1935. doi:10.1093/molbev/msx136

676 McLean, C. A., Moussalli, A., & Stuart-Fox, D. (2014). Local adaptation and divergence in  
677 colour signal conspicuousness between monomorphic and polymorphic lineages in a  
678 lizard. *Journal of Evolutionary Biology*, 27(12), 2654–2664. doi:10.1111/jeb.12521

679 McLean, C. A., & Stuart-Fox, D. (2014). Geographic variation in animal colour  
680 polymorphisms and its role in speciation. *Biological Reviews*, 89(4), 860–873.  
681 doi:10.1111/brv.12083

682 McLean, C. A., Stuart-Fox, D., & Moussalli, A. (2014). Phylogeographic structure,  
683 demographic history and morph composition in a colour polymorphic lizard. *Journal of*  
684 *Evolutionary Biology*, 27(10), 2123–2137. doi:10.1111/jeb.12464

685 McLean, C. A., Moussalli, A., Sass, S., & Stuart-Fox, D. (2013). Taxonomic assessment of  
686 the *Ctenophorus decresii* (Reptilia: Agamidae) complex reveals a new species of dragon  
687 lizard from western New South Wales. *Records of the Australian Museum*, 65, 51–63.

688 McLean, C. A., Stuart-Fox, D., & Moussalli, A. (2015). Environment, but not genetic  
689 divergence, influences geographic variation in colour morph frequencies in a lizard.  
690 *BMC Evolutionary Biology*, 15(1), 156. doi:10.1186/s12862-015-0442-x

691 Meiklejohn, C. D., Holmbeck, M. A., Siddiq, M. A., Abt, D. N., Rand, D. M., & Montooth,  
692 K. L. (2013). An incompatibility between a mitochondrial tRNA and its nuclear-encoded  
693 tRNA synthetase compromises development and fitness in *Drosophila*. *PLoS Genetics*,  
694 9(1), e1003238. doi:10.1371/journal.pgen.1003238

695 Melville, J., Haines, M. L., Boysen, K., Hodkinson, L., Kilian, A., Smith Date, K. L., ...  
696 Parris, K. M. (2017). Identifying hybridization and admixture using SNPs: application of  
697 the DArTseq platform in phylogeographic research on vertebrates. *Royal Society Open*  
698 *Science*, 4, 161061. doi:10.1098/rsos.161061

699 Muller, H. J. (1942). Isolating mechanisms, evolution, and temperature. *Biol Symp*, 6, 71–125.

700 Niehuis, O., Judson, A. K., & Gadau, J. (2008). Cytonuclear genic incompatibilities cause  
701 increased mortality in male F2 hybrids of *Nasonia giraulti* and *N. vitripennis*. *Genetics*,  
702 178(1), 413–426. doi:10.1534/genetics.107.080523

703 O'Neill, E. M., & Beard, K. H. (2010). Genetic basis of a color pattern polymorphism in the  
704 coqui frog *Eleutherodactylus coqui*. *Journal of Heredity*, 101(6), 703–709.  
705 doi:10.1093/jhered/esq082

706 Osborne, L., Umbers, K. D. L., Backwell, P. R. Y., & Keogh, J. S. (2012). Male tawny  
707 dragons use throat patterns to recognize rivals. *Naturwissenschaften*, 99(10), 869–872.  
708 doi:10.1007/s00114-012-0968-3

709 Pardo-Diaz, C., Salazar, C., Baxter, S. W., Merot, C., Figueiredo-Ready, W., Joron, M., ...  
710 Jiggins, C. D. (2012). Adaptive introgression across species boundaries in *Heliconius*  
711 butterflies. *PLoS Genetics*, 8(6), e1002752. doi:10.1371/journal.pgen.1002752

- Pritchard, J. K., Stephens, M., & Donnelly, P. (2000). Inference of population structure using multilocus genotype data. *Genetics*, 155(2), 945–959. doi:10.1111/j.1471-8286.2007.01758.x
- Pryke, S. R., & Griffith, S. C. (2009). Postzygotic genetic incompatibility between sympatric color morphs. *Evolution*, 63(3), 793–798. doi:10.1111/j.1558-5646.2008.00584.x
- Ramos, J. A., & Peters, R. A. (2016). Dragon wars: Movement-based signalling by Australian agamid lizards in relation to species ecology. *Austral Ecology*, 41, 302–315. doi:10.1111/aec.12312
- Rankin, K. J., McLean, C. A., Kemp, D. J., & Stuart-Fox, D. (2016). The genetic basis of discrete and quantitative colour variation in the polymorphic lizard, *Ctenophorus decresii*. *BMC Evolutionary Biology*, 16(1), 1–14. doi:10.1186/s12862-016-0757-2
- Rankin, K. J., & Stuart-Fox, D. (2015). Testosterone-induced expression of male colour morphs in females of the polymorphic tawny dragon lizard, *Ctenophorus decresii*. *PLOS ONE*, 10(10), e0140458. doi:10.1371/journal.pone.0140458
- Sætre, G. P., Moum, T., Bureš, S., Král, M., Adamjan, M., Moreno, J., ... Moreno, J. (1997). A sexually selected character displacement in flycatchers reinforces premating isolation. *Nature*, 387(June), 589–592. doi:10.1038/42451
- Schwartz, T. S., Warner, D. A., Beheregaray, L. B., Olsson, M., & Note, P. (2007). Microsatellite loci for Australian agamid lizards. *Molecular Ecology Notes*, 7(3), 528–531. doi:10.1111/j.1471-8286.2006.01644.x
- Scott, I. A. W. W., & Keogh, J. S. (2000). Conservation genetics of the endangered grassland earless dragon *Tympanocryptis pinguicolla* (Reptilia: Agamidae) in Southeastern Australia. *Conservation Genetics*, 1(4), 357–363. doi:10.1023/A:1011542717349
- Seehausen, O., Terai, Y., Magalhaes, I. S., Carleton, K. L., Mrosso, H. D. J., Miyagi, R., ... Okada, N. (2008). Speciation through sensory drive in cichlid fish. *Nature*, 455(7213), 620–U23. doi:10.1038/nature07285
- Sinervo, B., & Svensson, E. (2002). Correlational selection and the evolution of genomic architecture. *Heredity*, 89(5), 329–338. doi:10.1038/sj.hdy.6800148
- Sinervo, B., & Lively, C. M. (1996). The rock-paper-scissors game and the evolution of alternative male strategies. *Nature*, 380(6571), 240–243.
- Sinervo, B., Bleay, C., Adamopoulou, C., Inervo, B. A. S., & Leay, C. O. B. (2001). Social causes of correlational selection and the resolution of a heritable throat color polymorphism in a lizard. *Evolution*, 55(10), 2040–2052. doi:10.1554/0014-3820(2001)055
- Smith, K. R., Cadena, V., Endler, J. A., Kearney, M. R., Porter, W. P., & Stuart-Fox, D. (2016). Color change for thermoregulation versus camouflage in free-ranging lizards. *American Naturalist*, 188(6), 668–678. doi:10.1086/688765
- Stein, A. C., & Uy, J. A. C. (2006). Unidirectional introgression of a sexually selected trait across an avian hybrid zone: a role for female choice? *Evolution*, 60(7), 1476–1485. doi:10.1111/j.0014-3820.2006.tb01226.x



- Stevens, M., Párraga, C. A., Cuthill, I. C., Partridge, J. C., & Troscianko, T. S. (2007). Using digital photography to study animal coloration. *Biological Journal of the Linnean Society*, 90, 211–237. doi:10.1111/j.1095-8312.2007.00725.x
- Stuart-Fox, D., & Johnston, G. R. (2005). Experience overrides colour in lizard contests. *Behaviour*, 142, 329–350. doi:10.1163/1568539053778265
- Symonds, M. R. E., & Moussalli, A. (2011). A brief guide to model selection, multimodel inference and model averaging in behavioural ecology using Akaike's information criterion. *Behavioral Ecology and Sociobiology*, 65, 13–21. doi:10.1007/s00265-010-1037-6
- Szymura, J. M., & Barton, N. H. (1986). Genetic analysis of a hybrid zone between the fire-bellied toads, *Bombina bombina* and *B. variegata*, near Cracow in Southern Poland. *Evolution*, 40(6), 1141–1159.
- Szymura, J. M., & Barton, N. H. (1991). The genetic structure of the hybrid zone between the fire-bellied toads *Bombina bombina* and *B. variegata*: comparisons between transects and between loci. *Evolution*, 45(2), 237–261. doi:10.1111/j.1558-5646.1991.tb04400.x
- Teasdale, L. C., Stevens, M., & Stuart-Fox, D. (2013). Discrete colour polymorphism in the tawny dragon lizard (*Ctenophorus decresii*) and differences in signal conspicuousness among morphs. *Journal of Evolutionary Biology*, 26(5), 1035–1046. doi:10.1111/jeb.12115
- Vähä, J. P., & Primmer, C. R. (2006). Efficiency of model-based Bayesian methods for detecting hybrid individuals under different hybridization scenarios and with different numbers of loci. *Molecular Ecology*, 15(1), 63–72. doi:10.1111/j.1365-294X.2005.02773.x
- Venables, W. N., & Ripley, B. D. (2002). *Modern Applied Statistics with S* (Fourth). New York: Springer. Retrieved from <http://www.stats.ox.ac.uk/pub/MASS4>
- Wellenreuther, M., Svensson, E. I., & Hansson, B. (2014). Sexual selection and genetic colour polymorphisms in animals. *Molecular Ecology*, 23(22), 5398–5414. doi:10.1111/mec.12935
- West-Eberhard, M. J. (1986). Alternative adaptations, speciation, and phylogeny (A Review). *Proceedings of the National Academy of Sciences*, 83, 1388–1392. doi:10.1073/pnas.83.5.1388
- While, G. M., Michaelides, S., Heathcote, R. J. P., Macgregor, H. E. A., Zajac, N., Beninde, J., ... Uller, T. (2015). Sexual selection drives asymmetric introgression in wall lizards. *Ecology Letters*, 18(12), 1366–1375. doi:10.1111/ele.12531
- Yewers, M. S. C., Jessop, T. S., & Stuart-Fox, D. (2017). Endocrine differences among colour morphs in a lizard with alternative behavioural strategies. *Hormones and Behavior*, 93, 118–127. doi:10.1016/j.yhbeh.2017.05.001
- Yewers, M. S. C., Pryke, S. R., & Stuart-Fox, D. (2016). Behavioural differences across contexts may indicate morph-specific strategies in the lizard *Ctenophorus decresii*. *Animal Behaviour*, 111, 329–339. doi:10.1016/j.anbehav.2015.10.029

## Tables

**Table 1.** Populations sampled across the species range [Northern Flinders Ranges (NFR), Southern Flinders Ranges (SFR), Olary Ranges (OR), Contact Zone (CZ), Mainland South (MS), and Kangaroo Island (KI)] with details of sample size for the SNP dataset ( $N$ ), expected and observed heterozygosity ( $H_{\text{exp}}$ ,  $H_{\text{obs}}$ ), inbreeding coefficient ( $F$ ), allele number (AN), and allelic richness (AR).

| Population | $N$ (♂ / ♀ / NA) | $H_{\text{exp}}$ | $H_{\text{obs}}$ | $F$   | AN   | AR    |
|------------|------------------|------------------|------------------|-------|------|-------|
| NFR        | 7 (2 / 0 / 5)    | 0.064            | 0.055            | 0.177 | 1629 | 0.222 |
| SFR        | 41 (31 / 8 / 2)  | 0.076            | 0.070            | 0.129 | 2091 | 0.569 |
| OR         | 60 (45 / 7 / 8)  | 0.072            | 0.060            | 0.177 | 2138 | 0.604 |
| CZ         | 82 (69 / 13 / 0) | 0.084            | 0.079            | 0.095 | 2134 | 0.601 |
| MS         | 33 (26 / 4 / 3)  | 0.051            | 0.043            | 0.175 | 1714 | 0.286 |
| KI         | 7 (6 / 1 / 0)    | 0.023            | 0.019            | 0.165 | 1429 | 0.072 |
| Total      | 230              |                  |                  |       |      |       |

†Sex was unknown for a portion of loaned museum tissue samples.

**Table 2.** Model-averaged estimates for cline centre and width based on the AIC 95% confidence set models, with  $N$  representing the number of models within the AIC confident set. Cline centre is the distance (km) from the southern-most sampling site and width ( $w$ ) is  $1/\text{slope}$  at the centre. Two log-likelihood unit support limits are shown as ‘low’ and ‘high’. See Table S6 for full details of cline models.

| Trait                                      | <i>N</i>          | Centre | (low – high)    | Width           | (low – high)    |                |
|--------------------------------------------|-------------------|--------|-----------------|-----------------|-----------------|----------------|
| Hybrid Index (H <sub>Index</sub> )         | 10                | 28.41  | (22.37 – 33.00) | 29.77           | (15.05 – 55.84) |                |
| mtDNA                                      | 7                 | 27.78  | (14.59 – 28.17) | 0.64            | (0.08 – 21.85)  |                |
| Dorsolateral Phenotype (D <sub>PC1</sub> ) | 2                 | 23.02  | (16.33 – 27.61) | 13.97           | (0.82 – 29.02)  |                |
| Throat Phenotype                           | QC <sub>UVS</sub> | 4      | 15.90           | (14.25 – 20.48) | 8.48            | (0.74 – 17.27) |
|                                            | T <sub>PC1</sub>  | 2      | 15.38           | (15.06 – 16.61) | 3.22            | (2.43 – 7.94)  |



## Figures

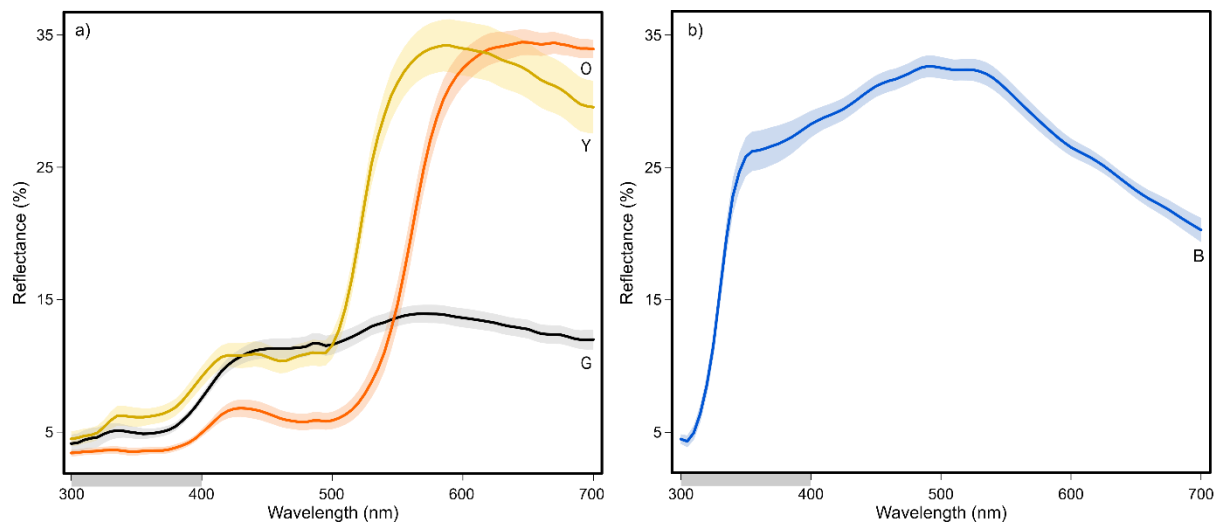

**Figure 1.** Average spectral reflectances of male throat colours found in *C. decresii*. (a) Northern lineage throat colours: orange (O), yellow (Y), grey (G). (b) Southern lineage ultra-violet blue (B) throat colour. Standard error shown as shaded region (N = 10 for each colour). Ultraviolet wavelengths are shown with a grey bar on the x-axis.

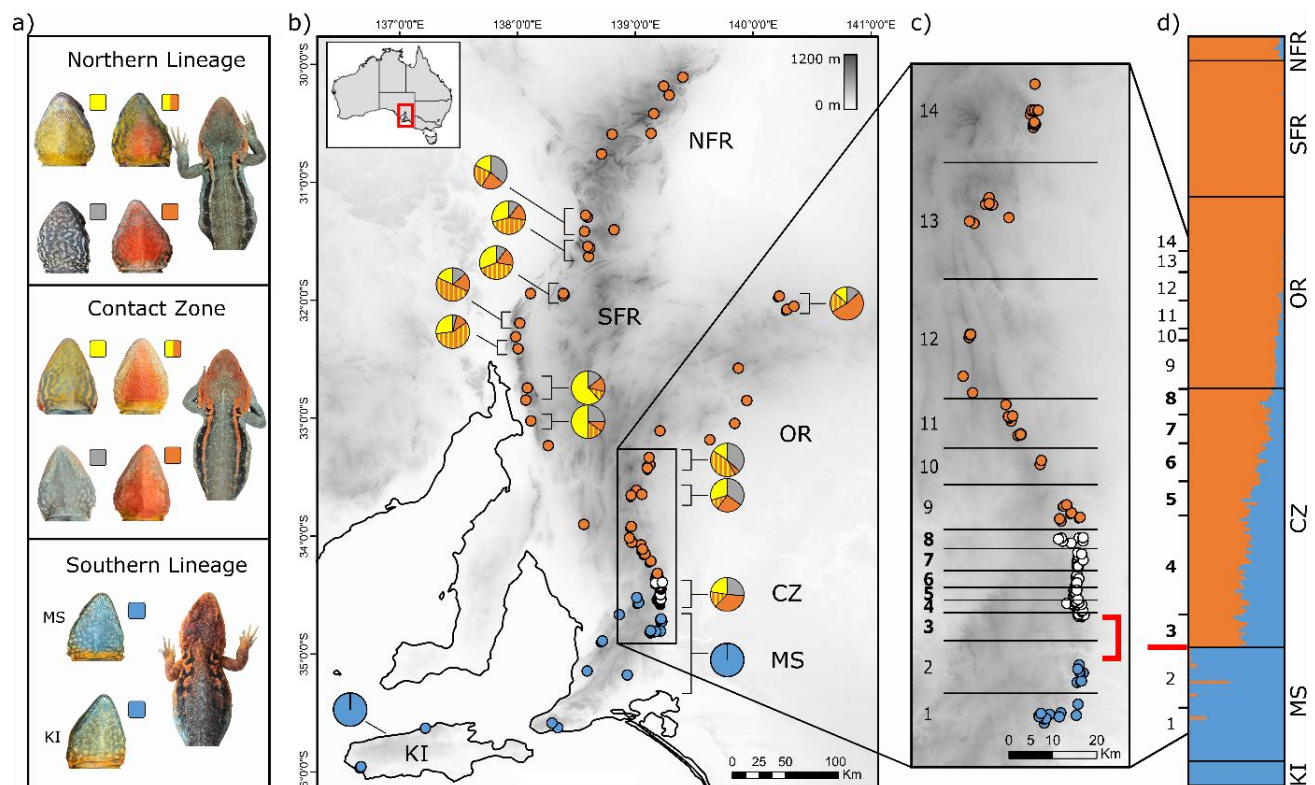

**Figure 2.** Geographic variation in throat colour morphs and genetic structure between lineages of *C. decresii*. (a) Representative throats (North: yellow, orange-yellow, grey and orange; South: blue) and dorsolateral phenotypes found in each lineage and the contact zone. (b) Map showing sampling localities of individuals used in genetic analyses [Northern Flinders Ranges (NFR), Southern Flinders Ranges (SFR), Olary Ranges (OR), Mainland South (MS), and Kangaroo Island (KI)] and relative frequencies of male throat colour morphs within populations. Proportions for the Southern Flinders Ranges and northernmost population in the Olary Ranges are adapted from McLean, Stuart-Fox, & Moussalli, 2015. Throat colour morph data are not available for the Northern Flinders Ranges. Elevation in meters is represented by grey shading on the scale bar. (c) An enlarged map section showing sites across the contact zone transect used for geographic cline analyses; (d) Results of a Bayesian analysis of ancestry in the program STRUCTURE ( $K = 2$ ). Each horizontal bar represents an individual and individuals are ordered by latitude and population. The proportion of blue and orange represents the proportion of southern and northern ancestry in each individual. A density trough between sites 2 and 3, where surveys did not recover any individuals, is indicated in red in panels B and C.

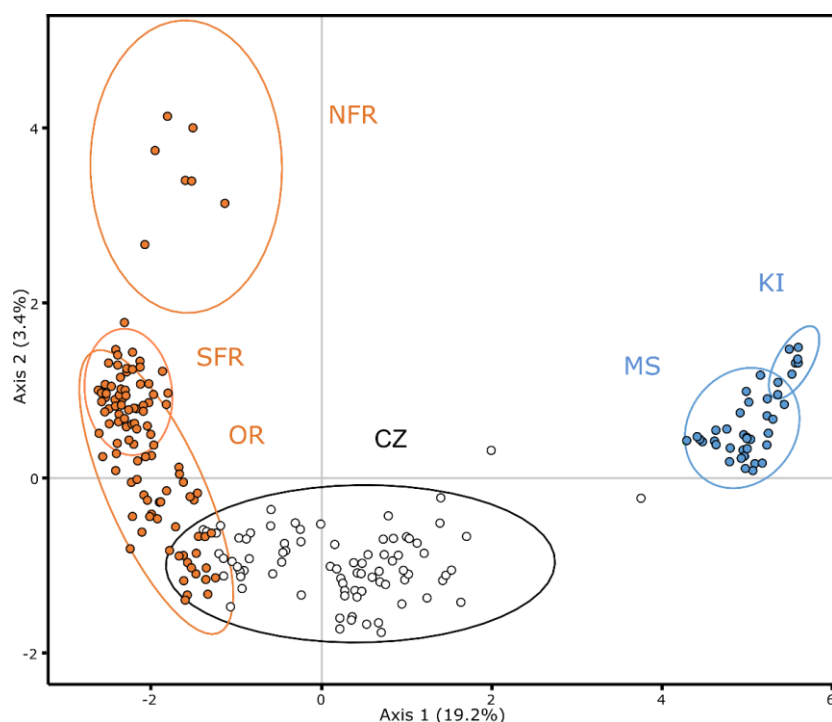

**Figure 3.** Two-dimensional principal coordinate plot (PCoA) constructed from the full SNP data set (1,333 loci) showing pairwise genetic distances between individuals. 95% confidence ellipses of each population are shown [Northern Flinders Ranges (NFR), Southern Flinders Ranges (SFR), Olary Ranges (OR), Contact Zone (CZ), Mainland South (MS), and Kangaroo Island (KI)]. Two outlying admixed individuals (from the 95% confidence ellipse) were those found in the southern geographic range (MS).

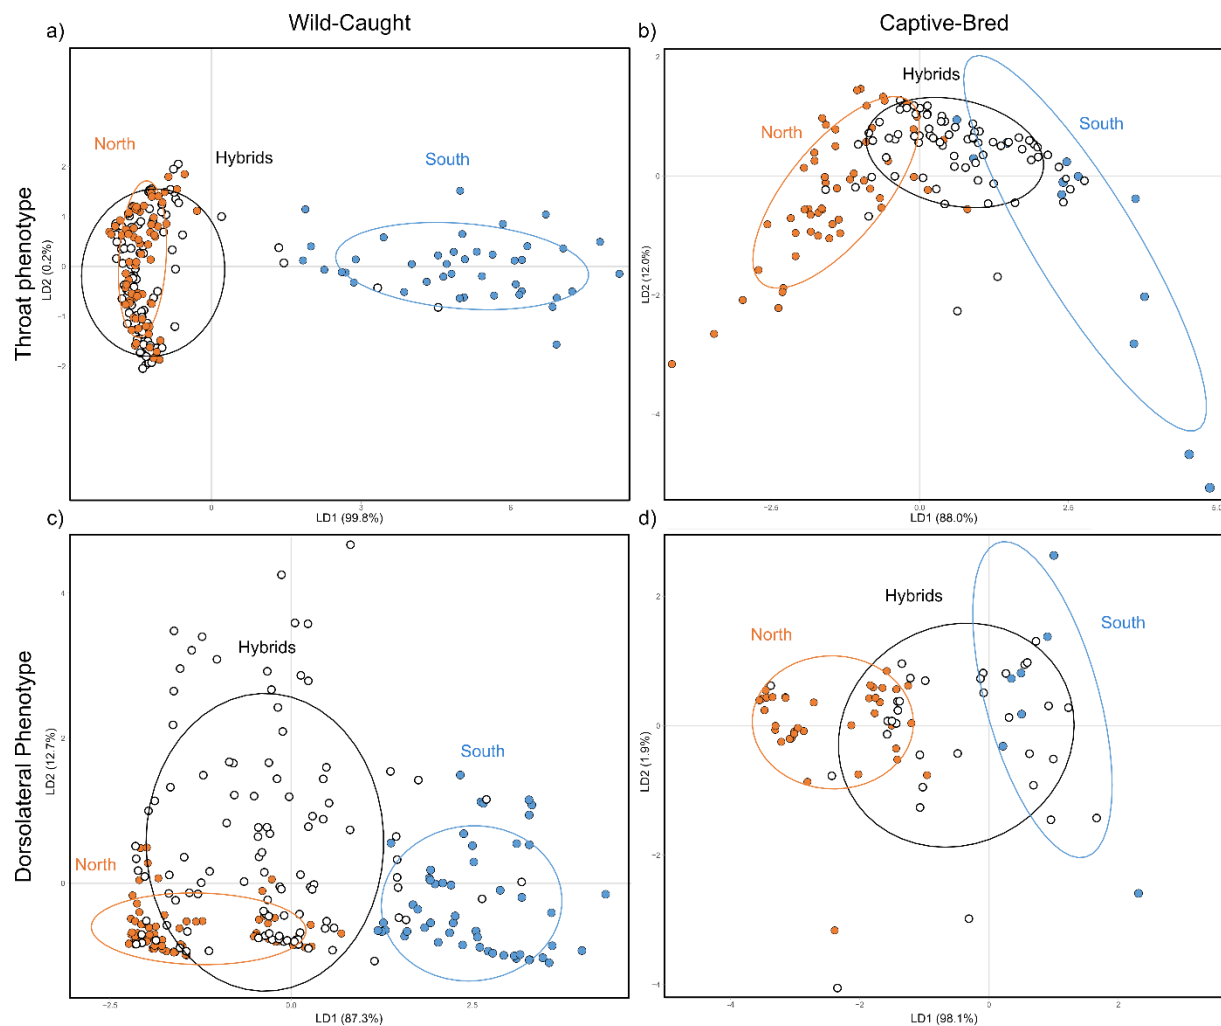

**Figure 4.** Biplots of linear discriminant analyses on (a, b) throat and (c, d) dorsolateral phenotype variables for (a, c) wild-caught individuals along the contact zone transect and (b, d) captive-bred pure and F1 hybrid offspring. 95% confidence ellipses are shown.

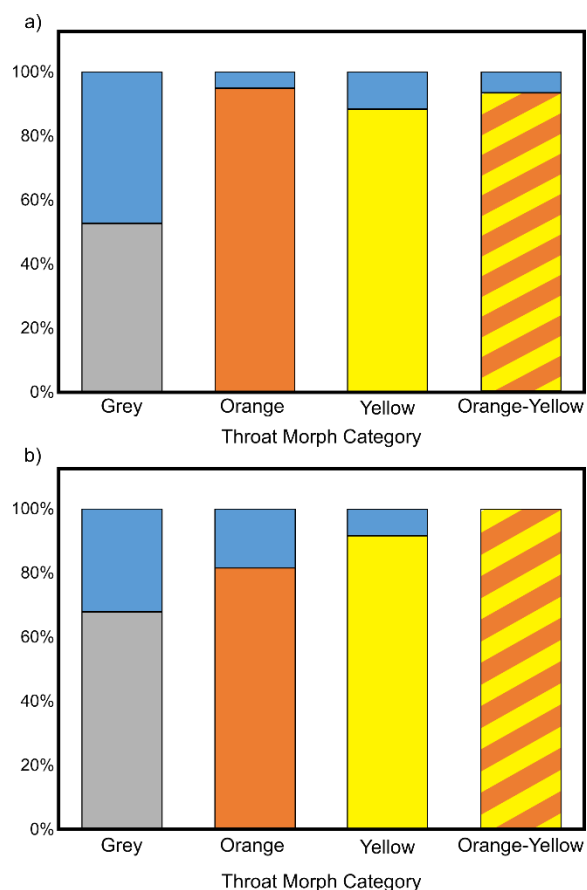

**Figure 5.** Percentage of individuals in each throat morph category which exhibit a degree of blue coloration on the throat for (a) wild-caught male hybrids and (b) captive-bred F1 hybrids (both sexes).

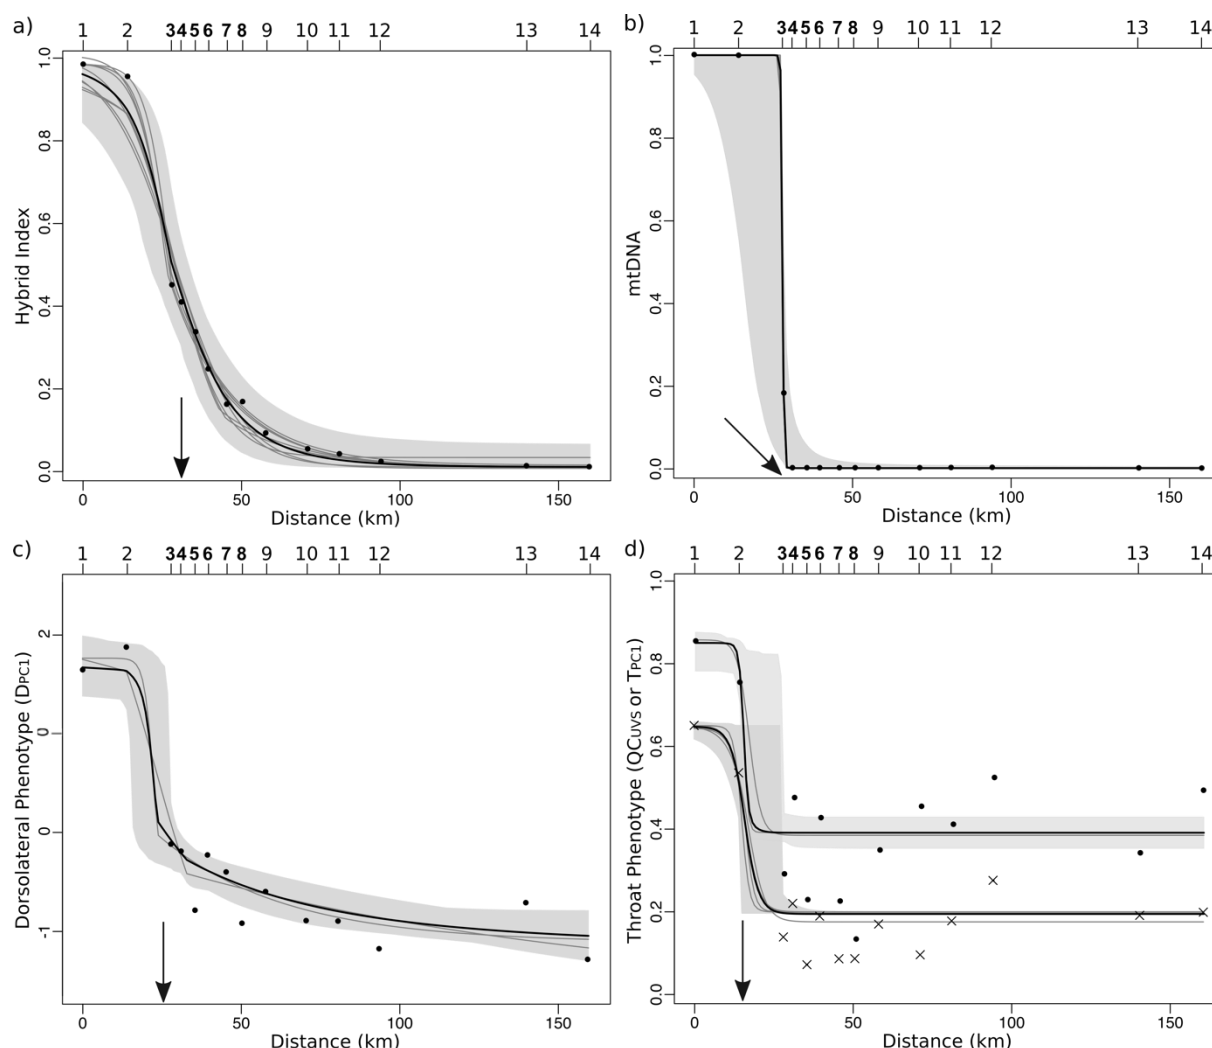

**Figure 6.** AICc model-averaged geographic clines (black) and credible regions, clines comprising the 95% confidence set of models (grey), and observed frequencies at each site for (a) the hybrid index estimated from 1333 loci ( $N = 154$ ), (b) mtDNA haplotype frequencies ( $N = 74$ ), (c) dorsolateral phenotype ( $D_{PC1}$ ;  $N = 233$ ), and (d) throat phenotype clines ( $N = 204$  for both): quantum catch of UV receptor ( $QC_{UVS}$ ; lower cline, frequencies shown with ‘x’ symbols) and throat colouration ( $TP_{C1}$ ; upper cline). Numbers along the top refer to sampling sites (see Table S2 for sample sizes at each site), bolded sites (3 – 8) comprise the contact zone. Transect distance is the cumulative distance from the southern-most population with increasing distance northwards. Arrows indicate cline centres; throat phenotype clines have essentially the same centres and are indicated with one arrow.

## Supplemental Information

**Table S1.** Details of all individuals used in the study, including if the individual was sequenced (SNPs and/or mitochondrial ND4 gene), had dorsal/ventral photos and spectral reflectance measurements, and the sex (M = male, F = female). Population [Southern: Kangaroo Island (KI), Mainland South (MS); Northern: Northern Flinders Ranges (NFR), Southern Flinders Ranges (SFR), Olary Ranges (OR); and Contact Zone (CZ)], year, and cline site (if applicable) are shown.

| ID     | SNPs | ND4 | Photos | Specs | Sex | Pop | Year | Cline Site | Latitude | Longitude |
|--------|------|-----|--------|-------|-----|-----|------|------------|----------|-----------|
| KI206  | Y    | N   | N      | N     | M   | KI  | 2010 | NA         | -35.965  | 136.653   |
| KI208  | Y    | N   | N      | N     | M   | KI  | 2011 | NA         | -35.965  | 136.653   |
| KI194  | Y    | N   | N      | N     | F   | KI  | 2010 | NA         | -35.964  | 136.653   |
| KI179  | Y    | N   | N      | N     | M   | KI  | 2010 | NA         | -35.963  | 136.654   |
| KI193  | Y    | N   | N      | N     | M   | KI  | 2010 | NA         | -35.963  | 136.654   |
| KI181  | Y    | N   | N      | N     | M   | KI  | 2010 | NA         | -35.960  | 136.655   |
| KI215  | Y    | N   | N      | N     | M   | KI  | 2011 | NA         | -35.621  | 137.210   |
| R45184 | Y    | N   | N      | N     | NA  | MS  | 1994 | NA         | -35.642  | 138.329   |
| R49234 | Y    | N   | N      | N     | NA  | MS  | 1996 | NA         | -35.601  | 138.279   |
| R53785 | Y    | N   | N      | N     | F   | MS  | 2000 | NA         | -35.194  | 138.919   |
| R55041 | Y    | N   | N      | N     | F   | MS  | 2000 | NA         | -35.160  | 138.578   |
| M232   | Y    | N   | N      | N     | M   | MS  | 2011 | NA         | -34.908  | 138.707   |
| M235   | Y    | N   | N      | N     | M   | MS  | 2011 | NA         | -34.906  | 138.702   |
| M248   | Y    | N   | N      | N     | M   | MS  | 2011 | NA         | -34.906  | 138.707   |
| R42978 | Y    | N   | N      | N     | NA  | MS  | 1993 | NA         | -34.683  | 138.850   |
| 631    | Y    | N   | N      | N     | M   | MS  | 2012 | NA         | -34.582  | 139.015   |
| KS630  | Y    | N   | N      | N     | M   | MS  | 2012 | NA         | -34.582  | 139.015   |
| KS631  | Y    | N   | N      | N     | M   | MS  | 2012 | NA         | -34.582  | 139.015   |
| KS632  | Y    | N   | N      | N     | M   | MS  | 2012 | NA         | -34.582  | 139.015   |
| KS634  | Y    | N   | N      | N     | F   | MS  | 2012 | NA         | -34.581  | 139.015   |
| R27416 | N    | Y   | N      | N     | NA  | MS  | 2012 | 1          | -34.842  | 139.133   |
| 638    | N    | Y   | N      | N     | F   | MS  | 2012 | 1          | -34.831  | 139.130   |
| 639    | N    | Y   | N      | N     | F   | MS  | 2012 | 1          | -34.494  | 139.201   |
| 640    | N    | Y   | N      | N     | F   | MS  | 2012 | 1          | -34.830  | 139.129   |
| 641    | N    | Y   | N      | N     | M   | MS  | 2012 | 1          | -34.494  | 139.201   |
| 642    | N    | Y   | N      | N     | F   | MS  | 2012 | 1          | -34.833  | 139.128   |
| PB1    | Y    | N   | Y      | N     | M   | MS  | 2013 | 1          | -34.834  | 139.128   |
| S42    | Y    | N   | Y      | Y     | M   | MS  | 2016 | 1          | -34.830  | 139.129   |

|      |   |   |   |   |   |    |      |   |         |         |
|------|---|---|---|---|---|----|------|---|---------|---------|
| S32  | N | N | Y | Y | M | MS | 2015 | 1 | -34.830 | 139.128 |
| S44  | N | N | Y | Y | M | MS | 2016 | 1 | -34.829 | 139.129 |
| S31  | Y | Y | Y | Y | M | MS | 2015 | 1 | -34.829 | 139.130 |
| S39  | N | N | Y | Y | M | MS | 2015 | 1 | -34.829 | 139.129 |
| S47  | Y | Y | Y | Y | M | MS | 2016 | 1 | -34.828 | 139.124 |
| S30  | N | N | Y | Y | M | MS | 2015 | 1 | -34.826 | 139.129 |
| S40  | N | N | Y | Y | M | MS | 2015 | 1 | -34.826 | 139.160 |
| S33  | N | N | Y | Y | M | MS | 2015 | 1 | -34.822 | 139.162 |
| S29  | Y | N | Y | Y | M | MS | 2015 | 1 | -34.822 | 139.116 |
| S8   | Y | Y | N | N | F | MS | 2015 | 1 | -34.822 | 139.116 |
| S27  | N | N | Y | Y | M | MS | 2015 | 1 | -34.821 | 139.121 |
| S28  | N | N | Y | Y | M | MS | 2015 | 1 | -34.821 | 139.121 |
| PB9  | N | N | Y | N | M | MS | 2013 | 1 | -34.821 | 139.160 |
| PB10 | N | N | Y | N | M | MS | 2013 | 1 | -34.821 | 139.160 |
| PB4  | N | N | Y | N | M | MS | 2013 | 1 | -34.820 | 139.137 |
| PB8  | Y | Y | Y | N | M | MS | 2013 | 1 | -34.821 | 139.160 |
| 641  | N | N | Y | Y | M | MS | 2012 | 1 | -34.494 | 139.201 |
| PB2  | N | N | Y | N | M | MS | 2013 | 1 | -34.820 | 139.160 |
| PB3  | N | N | Y | N | M | MS | 2013 | 1 | -34.820 | 139.132 |
| PB5  | N | N | Y | N | M | MS | 2013 | 1 | -34.819 | 139.162 |
| S21  | Y | N | Y | Y | M | MS | 2015 | 1 | -34.818 | 139.162 |
| PB6  | N | N | Y | N | M | MS | 2013 | 1 | -34.818 | 139.163 |
| S36  | N | N | Y | Y | M | MS | 2015 | 1 | -34.818 | 139.163 |
| PB7  | N | N | Y | N | M | MS | 2013 | 1 | -34.818 | 139.164 |
| S26  | N | N | Y | Y | M | MS | 2015 | 1 | -34.817 | 139.117 |
| 710  | Y | N | N | N | M | MS | 2013 | 1 | -34.817 | 139.117 |
| S25  | Y | N | Y | Y | M | MS | 2015 | 1 | -34.817 | 139.116 |
| S24  | N | N | Y | Y | M | MS | 2015 | 1 | -34.817 | 139.164 |
| S35  | N | N | Y | Y | M | MS | 2015 | 1 | -34.817 | 139.114 |
| S22  | N | N | Y | Y | M | MS | 2015 | 1 | -34.817 | 139.165 |
| S23  | N | N | Y | Y | M | MS | 2015 | 1 | -34.817 | 139.165 |
| S37  | N | N | Y | Y | M | MS | 2015 | 1 | -34.816 | 139.163 |
| S38  | N | N | Y | Y | M | MS | 2015 | 1 | -33.022 | 138.000 |
| 1142 | N | N | Y | Y | M | MS | 2017 | 2 | -34.793 | 139.203 |
| 1179 | N | N | Y | Y | M | MS | 2017 | 2 | -34.742 | 139.212 |
| 1177 | Y | N | Y | Y | M | MS | 2017 | 2 | -34.742 | 139.211 |
| 1178 | N | N | Y | Y | M | MS | 2017 | 2 | -34.740 | 139.211 |
| 1145 | Y | N | Y | Y | M | MS | 2017 | 2 | -34.726 | 139.214 |
| 1146 | Y | N | Y | Y | M | MS | 2017 | 2 | -34.725 | 139.214 |
| 703  | Y | N | Y | N | M | MS | 2013 | 2 | -34.725 | 139.214 |
| 1140 | N | N | Y | Y | M | MS | 2017 | 2 | -34.723 | 139.216 |
| 1143 | N | N | Y | Y | M | MS | 2017 | 2 | -34.723 | 139.214 |
| 1141 | Y | N | Y | Y | M | MS | 2017 | 2 | -34.723 | 139.215 |



|       |   |   |   |   |   |    |      |   |         |         |
|-------|---|---|---|---|---|----|------|---|---------|---------|
| 1144  | Y | N | Y | Y | M | MS | 2017 | 2 | -34.723 | 139.215 |
| 1171  | N | N | Y | Y | M | MS | 2017 | 2 | -34.721 | 139.215 |
| 1164  | N | N | Y | Y | M | MS | 2017 | 2 | -34.721 | 139.215 |
| 1167  | N | N | Y | Y | M | MS | 2017 | 2 | -34.721 | 139.213 |
| 1168  | Y | N | Y | Y | M | MS | 2017 | 2 | -34.721 | 139.213 |
| 1169  | N | N | Y | Y | M | MS | 2017 | 2 | -34.721 | 139.213 |
| 1170  | N | N | Y | Y | M | MS | 2017 | 2 | -34.721 | 139.213 |
| 1166  | N | N | Y | Y | M | MS | 2017 | 2 | -34.720 | 139.213 |
| 709   | Y | Y | N | N | M | MS | 2013 | 2 | -34.720 | 139.207 |
| 700   | N | N | Y | N | M | MS | 2013 | 2 | -34.720 | 139.214 |
| 1165  | Y | N | Y | Y | M | MS | 2017 | 2 | -34.720 | 139.214 |
| 706   | Y | N | N | N | M | MS | 2013 | 2 | -34.718 | 139.206 |
| S1107 | Y | N | Y | Y | M | MS | 2016 | 2 | -34.701 | 139.206 |
| 1180  | N | N | Y | Y | M | CZ | 2017 | 3 | -34.591 | 139.218 |
| H1106 | Y | N | Y | Y | M | CZ | 2016 | 3 | -34.590 | 139.218 |
| 1186  | N | N | Y | Y | M | CZ | 2017 | 3 | -34.590 | 139.209 |
| 1185  | Y | Y | Y | Y | M | CZ | 2017 | 3 | -34.589 | 139.211 |
| 1187  | N | N | Y | Y | M | CZ | 2017 | 3 | -34.588 | 139.215 |
| 1184  | N | N | Y | Y | M | CZ | 2017 | 3 | -34.588 | 139.215 |
| H1104 | Y | Y | N | N | F | CZ | 2016 | 3 | -34.588 | 139.218 |
| 1182  | N | N | Y | Y | M | CZ | 2017 | 3 | -34.588 | 139.217 |
| 1183  | N | N | Y | Y | M | CZ | 2017 | 3 | -34.587 | 139.216 |
| 759   | Y | N | Y | N | M | CZ | 2013 | 3 | -34.587 | 139.207 |
| 758   | N | N | Y | N | M | CZ | 2013 | 3 | -34.587 | 139.206 |
| 756   | Y | Y | Y | N | M | CZ | 2013 | 3 | -34.586 | 139.206 |
| 754   | Y | N | N | N | M | CZ | 2013 | 3 | -34.586 | 139.205 |
| 1215  | N | N | Y | Y | M | CZ | 2017 | 3 | -34.585 | 139.216 |
| 1217  | N | N | Y | Y | M | CZ | 2017 | 3 | -34.585 | 139.216 |
| 1216  | N | N | Y | Y | M | CZ | 2017 | 3 | -34.585 | 139.216 |
| H1100 | Y | N | Y | Y | M | CZ | 2016 | 3 | -34.583 | 139.215 |
| H1101 | Y | N | Y | Y | M | CZ | 2016 | 3 | -34.583 | 139.215 |
| H1102 | Y | Y | N | N | F | CZ | 2016 | 3 | -34.579 | 139.215 |
| H1103 | Y | Y | N | N | F | CZ | 2016 | 3 | -34.577 | 139.215 |
| H1099 | Y | N | Y | Y | M | CZ | 2016 | 3 | -34.577 | 139.203 |
| H1021 | Y | N | Y | Y | M | CZ | 2015 | 4 | -34.571 | 139.205 |
| 739   | Y | N | Y | N | M | CZ | 2013 | 4 | -34.564 | 139.211 |
| 738   | Y | Y | N | N | F | CZ | 2013 | 4 | -34.563 | 139.208 |
| 740   | Y | N | Y | N | M | CZ | 2013 | 4 | -34.563 | 139.213 |
| 741   | Y | Y | N | N | M | CZ | 2013 | 4 | -34.563 | 139.212 |
| 737   | Y | N | Y | N | M | CZ | 2013 | 4 | -34.563 | 139.207 |
| 753   | N | N | Y | N | M | CZ | 2013 | 4 | -34.561 | 139.193 |
| 716   | Y | N | Y | N | M | CZ | 2013 | 4 | -34.561 | 139.202 |
| 712   | N | N | Y | N | M | CZ | 2013 | 4 | -34.561 | 139.203 |

|       |   |   |   |   |   |    |      |   |         |         |
|-------|---|---|---|---|---|----|------|---|---------|---------|
| 713   | Y | N | N | N | M | CZ | 2013 | 4 | -34.559 | 139.205 |
| H1020 | Y | N | Y | Y | M | CZ | 2015 | 4 | -34.558 | 139.202 |
| H1019 | N | N | Y | Y | M | CZ | 2015 | 4 | -34.558 | 139.203 |
| H1009 | N | N | Y | Y | M | CZ | 2015 | 4 | -34.558 | 139.177 |
| H1018 | N | N | Y | Y | M | CZ | 2015 | 4 | -34.557 | 139.204 |
| 715   | N | N | Y | N | M | CZ | 2013 | 4 | -34.557 | 139.204 |
| H1017 | Y | Y | Y | Y | M | CZ | 2015 | 4 | -34.557 | 139.205 |
| H1051 | Y | N | Y | Y | M | CZ | 2016 | 4 | -34.557 | 139.200 |
| H1039 | N | N | Y | Y | M | CZ | 2015 | 4 | -34.556 | 139.199 |
| H1007 | Y | N | Y | Y | M | CZ | 2015 | 4 | -34.556 | 139.200 |
| H1048 | N | N | Y | Y | M | CZ | 2015 | 4 | -34.556 | 139.199 |
| H1008 | Y | N | Y | Y | M | CZ | 2015 | 4 | -34.556 | 139.198 |
| H1046 | N | N | Y | Y | M | CZ | 2015 | 4 | -34.556 | 139.198 |
| 746   | N | N | Y | N | M | CZ | 2013 | 4 | -34.556 | 139.199 |
| 742   | Y | Y | N | N | F | CZ | 2013 | 4 | -34.556 | 139.198 |
| H1049 | Y | N | Y | Y | M | CZ | 2016 | 4 | -34.556 | 139.199 |
| 743   | N | N | Y | N | M | CZ | 2013 | 4 | -34.556 | 139.198 |
| 745   | N | N | Y | N | M | CZ | 2013 | 4 | -34.556 | 139.197 |
| H1045 | N | N | Y | Y | M | CZ | 2015 | 4 | -34.556 | 139.199 |
| H1052 | Y | N | N | N | F | CZ | 2016 | 4 | -34.556 | 139.200 |
| H1050 | Y | N | Y | Y | M | CZ | 2016 | 4 | -34.556 | 139.200 |
| H1044 | N | N | Y | Y | M | CZ | 2015 | 4 | -34.556 | 139.200 |
| H1055 | Y | Y | N | N | F | CZ | 2016 | 4 | -34.556 | 139.201 |
| 744   | N | N | Y | N | M | CZ | 2013 | 4 | -34.556 | 139.202 |
| H1053 | Y | Y | Y | Y | M | CZ | 2016 | 4 | -34.556 | 139.200 |
| H1054 | Y | N | Y | Y | M | CZ | 2016 | 4 | -34.556 | 139.202 |
| H1056 | Y | Y | N | N | F | CZ | 2016 | 4 | -34.556 | 139.202 |
| H1010 | N | N | Y | Y | M | CZ | 2015 | 4 | -34.556 | 139.203 |
| H1014 | Y | N | Y | Y | M | CZ | 2015 | 4 | -34.556 | 139.203 |
| H1016 | Y | Y | Y | Y | M | CZ | 2015 | 4 | -34.556 | 139.202 |
| H1022 | Y | Y | Y | Y | M | CZ | 2015 | 4 | -34.556 | 139.201 |
| 748   | N | N | Y | N | M | CZ | 2013 | 4 | -34.556 | 139.199 |
| H1011 | Y | N | Y | Y | M | CZ | 2015 | 4 | -34.555 | 139.203 |
| H1015 | N | N | Y | Y | M | CZ | 2015 | 4 | -34.555 | 137.203 |
| H1013 | Y | N | Y | Y | M | CZ | 2015 | 4 | -34.555 | 139.203 |
| H1012 | Y | N | Y | Y | M | CZ | 2015 | 4 | -34.555 | 139.203 |
| H1023 | N | N | Y | Y | M | CZ | 2015 | 4 | -34.555 | 139.202 |
| H1027 | Y | Y | Y | Y | M | CZ | 2015 | 4 | -34.555 | 139.206 |
| H1041 | N | N | Y | Y | M | CZ | 2015 | 4 | -34.555 | 139.205 |
| 750   | N | N | Y | N | M | CZ | 2013 | 4 | -34.555 | 139.202 |
| H1042 | N | N | Y | Y | M | CZ | 2015 | 4 | -34.555 | 139.204 |
| H1043 | N | N | Y | Y | M | CZ | 2015 | 4 | -34.555 | 139.204 |
| H1040 | N | N | Y | Y | M | CZ | 2015 | 4 | -34.555 | 139.204 |

|       |   |   |   |   |   |    |      |   |         |         |
|-------|---|---|---|---|---|----|------|---|---------|---------|
| H1029 | N | N | Y | Y | M | CZ | 2015 | 4 | -34.555 | 139.204 |
| H1025 | Y | N | Y | Y | M | CZ | 2015 | 4 | -34.555 | 139.207 |
| H1026 | N | N | Y | Y | M | CZ | 2015 | 4 | -34.554 | 139.207 |
| H1024 | N | N | Y | Y | M | CZ | 2015 | 4 | -34.554 | 139.202 |
| H1028 | N | N | Y | Y | M | CZ | 2015 | 4 | -34.554 | 139.206 |
| 751   | N | N | Y | N | M | CZ | 2013 | 4 | -34.554 | 139.202 |
| 749   | Y | Y | N | N | F | CZ | 2013 | 4 | -34.552 | 139.203 |
| H1086 | Y | N | Y | Y | M | CZ | 2016 | 4 | -34.551 | 139.192 |
| H1089 | Y | N | Y | Y | M | CZ | 2016 | 5 | -34.542 | 139.197 |
| H1091 | Y | Y | Y | Y | M | CZ | 2016 | 5 | -34.540 | 139.202 |
| H1092 | Y | Y | Y | Y | M | CZ | 2016 | 5 | -34.540 | 139.202 |
| H1057 | Y | N | Y | Y | M | CZ | 2016 | 5 | -34.540 | 139.198 |
| H1059 | Y | Y | Y | Y | M | CZ | 2016 | 5 | -34.539 | 139.196 |
| H1090 | Y | N | Y | Y | M | CZ | 2016 | 5 | -34.539 | 139.194 |
| 636   | Y | N | N | N | M | CZ | 2012 | 5 | -34.537 | 138.999 |
| H1097 | Y | Y | Y | Y | M | CZ | 2016 | 5 | -34.534 | 139.198 |
| H1060 | Y | Y | Y | Y | M | CZ | 2016 | 5 | -34.531 | 139.206 |
| H1093 | N | N | Y | Y | M | CZ | 2016 | 5 | -34.528 | 139.197 |
| H1096 | Y | N | Y | Y | M | CZ | 2016 | 5 | -34.526 | 139.195 |
| H1098 | Y | Y | Y | Y | M | CZ | 2016 | 5 | -34.526 | 139.195 |
| 637   | N | Y | N | N | F | CZ | 2012 | 6 | -34.494 | 139.201 |
| H1084 | Y | N | Y | Y | M | CZ | 2016 | 6 | -34.515 | 139.200 |
| H1075 | Y | N | N | N | F | CZ | 2016 | 6 | -34.513 | 139.201 |
| H1076 | N | N | Y | Y | M | CZ | 2016 | 6 | -34.513 | 139.201 |
| H1082 | Y | Y | Y | Y | M | CZ | 2016 | 6 | -34.513 | 139.200 |
| H1078 | Y | N | Y | Y | M | CZ | 2016 | 6 | -34.513 | 139.200 |
| H1079 | Y | N | Y | Y | M | CZ | 2016 | 6 | -34.508 | 139.202 |
| H1081 | Y | N | Y | Y | M | CZ | 2016 | 6 | -34.507 | 139.202 |
| H1072 | N | N | Y | Y | M | CZ | 2016 | 6 | -34.503 | 139.205 |
| H1074 | Y | N | Y | Y | M | CZ | 2016 | 6 | -34.503 | 139.205 |
| H1071 | Y | Y | Y | Y | M | CZ | 2016 | 6 | -34.498 | 139.201 |
| H1068 | Y | N | Y | Y | M | CZ | 2016 | 6 | -34.495 | 139.202 |
| H1069 | N | N | Y | Y | M | CZ | 2016 | 6 | -34.495 | 139.202 |
| H1064 | Y | N | Y | Y | M | CZ | 2016 | 6 | -34.494 | 139.201 |
| H1065 | N | N | Y | Y | M | CZ | 2016 | 6 | -34.494 | 139.202 |
| 1218  | N | N | Y | Y | M | CZ | 2017 | 6 | -34.493 | 139.202 |
| 1220  | Y | N | Y | Y | M | CZ | 2017 | 6 | -34.492 | 139.203 |
| H1067 | Y | N | Y | Y | M | CZ | 2016 | 6 | -34.490 | 139.203 |
| 1222  | N | N | Y | Y | M | CZ | 2017 | 6 | -34.494 | 139.200 |
| 1221  | N | N | Y | Y | M | CZ | 2017 | 6 | -34.494 | 139.201 |
| 1223  | Y | N | Y | Y | M | CZ | 2017 | 7 | 34.494  | 139.201 |
| H1108 | Y | N | N | N | M | CZ | 2016 | 7 | -34.465 | 139.203 |
| H1109 | Y | N | Y | Y | M | CZ | 2016 | 7 | -34.464 | 139.203 |

|       |   |   |   |   |   |    |      |    |         |         |
|-------|---|---|---|---|---|----|------|----|---------|---------|
| H1111 | Y | Y | Y | Y | M | CZ | 2016 | 7  | -34.451 | 139.218 |
| H1110 | Y | N | N | N | F | CZ | 2016 | 7  | -34.451 | 139.219 |
| H1113 | Y | N | Y | Y | M | CZ | 2016 | 7  | -34.449 | 139.215 |
| H1112 | Y | N | Y | Y | M | CZ | 2016 | 7  | -34.448 | 139.209 |
| H1114 | Y | N | Y | Y | M | CZ | 2016 | 7  | -34.443 | 39.210  |
| H1115 | Y | N | N | N | F | CZ | 2016 | 7  | -34.436 | 139.212 |
| 627   | N | Y | N | N | M | CZ | 2012 | 8  | -34.411 | 139.159 |
| 628   | N | Y | N | N | F | CZ | 2012 | 8  | -34.411 | 139.159 |
| 629   | N | Y | N | N | F | CZ | 2012 | 8  | -34.413 | 139.161 |
| 719   | Y | Y | N | N | M | CZ | 2013 | 8  | -34.421 | 139.187 |
| 721   | Y | N | N | N | M | CZ | 2013 | 8  | -34.414 | 139.168 |
| 728   | Y | N | N | N | M | CZ | 2013 | 8  | -34.412 | 139.164 |
| 720   | Y | N | N | N | M | CZ | 2013 | 8  | -34.411 | 139.158 |
| H1139 | Y | N | Y | Y | M | CZ | 2016 | 8  | -34.409 | 139.210 |
| H1136 | Y | N | N | N | F | CZ | 2016 | 8  | -34.408 | 139.215 |
| H1137 | Y | N | Y | Y | M | CZ | 2016 | 8  | -34.408 | 139.215 |
| H1117 | Y | N | Y | Y | M | OR | 2016 | 9  | -34.366 | 139.164 |
| H1116 | Y | Y | Y | Y | M | OR | 2016 | 9  | -34.364 | 139.160 |
| 1173  | Y | N | Y | Y | M | OR | 2017 | 9  | -34.360 | 139.208 |
| 1174  | N | N | Y | Y | M | OR | 2017 | 9  | -34.360 | 139.208 |
| 1175  | Y | N | Y | Y | M | OR | 2017 | 9  | -34.358 | 139.209 |
| 1210  | N | N | Y | Y | M | OR | 2017 | 9  | -34.351 | 139.190 |
| 1224  | Y | N | Y | Y | M | OR | 2017 | 9  | -34.350 | 139.188 |
| 1225  | N | N | Y | Y | M | OR | 2017 | 9  | -34.350 | 139.188 |
| 1211  | N | N | Y | Y | M | OR | 2017 | 9  | -34.350 | 139.188 |
| 1209  | N | N | Y | Y | M | OR | 2017 | 9  | -34.349 | 139.189 |
| 1208  | Y | N | Y | Y | M | OR | 2017 | 9  | -34.349 | 139.188 |
| 1212  | Y | Y | Y | Y | M | OR | 2017 | 9  | -34.348 | 139.189 |
| 1214  | Y | N | Y | Y | M | OR | 2017 | 9  | -34.348 | 139.189 |
| 1213  | Y | N | Y | Y | M | OR | 2017 | 9  | -34.348 | 139.189 |
| 1159  | N | N | Y | Y | M | OR | 2017 | 9  | -34.332 | 139.173 |
| 1176  | N | N | Y | Y | M | OR | 2017 | 9  | -34.332 | 139.172 |
| 1163  | Y | N | Y | Y | M | OR | 2017 | 9  | -34.332 | 139.170 |
| 1162  | Y | Y | Y | Y | M | OR | 2017 | 9  | -34.331 | 139.173 |
| 1160  | Y | N | Y | Y | M | OR | 2017 | 9  | -34.331 | 139.174 |
| 1161  | Y | Y | N | N | F | OR | 2017 | 9  | -34.331 | 139.174 |
| H1121 | N | N | Y | Y | M | OR | 2016 | 9  | -34.331 | 139.174 |
| 1158  | Y | N | Y | Y | M | OR | 2017 | 9  | -34.331 | 139.174 |
| H1122 | Y | N | Y | Y | M | OR | 2016 | 9  | -34.331 | 139.173 |
| H1123 | Y | Y | Y | Y | M | OR | 2016 | 9  | -34.331 | 139.174 |
| H1124 | Y | N | Y | Y | M | OR | 2016 | 10 | -34.231 | 139.118 |
| H1125 | Y | Y | Y | Y | M | OR | 2016 | 10 | -34.228 | 139.118 |
| 1207  | Y | N | Y | Y | M | OR | 2017 | 11 | -34.167 | 139.069 |

|        |   |   |   |   |    |    |      |    |         |         |
|--------|---|---|---|---|----|----|------|----|---------|---------|
| H1133  | Y | N | Y | Y | M  | OR | 2016 | 11 | -34.167 | 139.069 |
| 1206   | N | N | Y | Y | M  | OR | 2017 | 11 | -34.167 | 139.069 |
| 1156   | Y | N | Y | Y | M  | OR | 2017 | 11 | -34.166 | 139.070 |
| 1155   | Y | N | Y | Y | M  | OR | 2017 | 11 | -34.166 | 139.071 |
| 1152   | Y | Y | Y | Y | M  | OR | 2017 | 11 | -34.132 | 139.048 |
| 1148   | Y | N | Y | Y | M  | OR | 2017 | 11 | -34.128 | 139.048 |
| 1154   | Y | N | Y | Y | M  | OR | 2017 | 11 | -34.127 | 139.048 |
| 1149   | Y | Y | N | N | F  | OR | 2017 | 11 | -34.127 | 139.048 |
| 1151   | N | N | Y | Y | M  | OR | 2017 | 11 | -34.127 | 139.048 |
| H1131  | Y | Y | Y | Y | M  | OR | 2016 | 11 | -34.127 | 139.049 |
| 1153   | N | N | Y | Y | M  | OR | 2017 | 11 | -34.125 | 139.047 |
| H1135  | Y | N | Y | Y | M  | OR | 2016 | 12 | -34.091 | 139.035 |
| 626    | Y | Y | N | N | M  | OR | 2012 | 12 | -34.070 | 138.957 |
| R58318 | Y | Y | N | N | NA | OR | 2003 | 12 | -34.031 | 138.935 |
| N27    | Y | N | Y | Y | M  | OR | 2015 | 12 | -33.935 | 138.952 |
| N16    | Y | N | Y | Y | M  | OR | 2015 | 12 | -33.934 | 138.952 |
| 623    | Y | N | N | N | M  | OR | 2012 | 12 | -33.934 | 138.952 |
| 618    | Y | Y | N | N | M  | OR | 2012 | 12 | -33.934 | 138.952 |
| R26108 | Y | N | N | N | NA | OR | 1984 | 12 | -33.917 | 138.550 |
| 619    | N | Y | N | N | M  | OR | 2012 | 12 | -33.934 | 138.952 |
| 620    | N | Y | N | N | F  | OR | 2012 | 12 | -33.934 | 138.952 |
| 622    | N | Y | N | N | F  | OR | 2012 | 12 | -33.934 | 138.952 |
| 624    | N | Y | N | N | F  | OR | 2012 | 12 | -       | -       |
| 625    | N | Y | N | N | F  | OR | 2012 | 12 | -34.070 | 138.957 |
| N28    | N | N | Y | Y | M  | OR | 2015 | 12 | -33.934 | 138.953 |
| 623    | Y | N | N | N | NA | OR | 1992 | 12 | -33.934 | 138.952 |
| R40708 | Y | Y | N | N | NA | OR | 1992 | 13 | -33.667 | 138.950 |
| 1205   | N | N | Y | Y | M  | OR | 2017 | 13 | -33.662 | 139.042 |
| 1197   | N | N | Y | Y | M  | OR | 2017 | 13 | -33.631 | 139.004 |
| 1195   | Y | Y | Y | Y | M  | OR | 2017 | 13 | -33.631 | 139.004 |
| 1203   | N | N | Y | Y | M  | OR | 2017 | 13 | -33.628 | 138.996 |
| 1194   | N | N | Y | Y | M  | OR | 2017 | 13 | -33.628 | 139.003 |
| 1190   | N | Y | Y | Y | M  | OR | 2017 | 13 | -33.628 | 139.001 |
| 1189   | Y | Y | Y | Y | M  | OR | 2017 | 13 | -33.628 | 138.999 |
| 1193   | N | N | Y | Y | M  | OR | 2017 | 13 | -33.628 | 139.002 |
| 1188   | N | N | Y | Y | M  | OR | 2017 | 13 | -33.627 | 138.999 |
| 1191   | Y | N | Y | Y | M  | OR | 2017 | 13 | -33.627 | 138.994 |
| 1200   | Y | Y | Y | Y | M  | OR | 2017 | 13 | -33.615 | 138.996 |
| 1201   | N | N | Y | Y | M  | OR | 2017 | 13 | -33.615 | 138.996 |
| 1202   | N | N | Y | Y | M  | OR | 2017 | 13 | -33.615 | 138.996 |
| R41631 | N | Y | N | N | M  | OR | 1992 | 13 | -33.675 | 138.961 |
| R38012 | N | Y | N | N | NA | OR | 1991 | 13 | -33.833 | 139.017 |
| 91     | N | Y | N | N | M  | OR | 2010 | 13 | -33.835 | 139.034 |

|        |   |   |   |   |    |     |      |    |         |         |
|--------|---|---|---|---|----|-----|------|----|---------|---------|
| N32    | N | N | Y | Y | M  | OR  | 2015 | 14 | -33.444 | 139.102 |
| N36    | Y | N | Y | Y | M  | OR  | 2015 | 14 | -33.442 | 139.104 |
| N34    | N | N | Y | Y | M  | OR  | 2015 | 14 | -33.442 | 139.104 |
| N30    | Y | Y | Y | Y | M  | OR  | 2015 | 14 | -33.441 | 139.103 |
| N33    | N | N | Y | Y | M  | OR  | 2015 | 14 | -33.441 | 139.103 |
| N42    | N | N | Y | Y | M  | OR  | 2016 | 14 | -33.439 | 139.103 |
| N49    | N | N | Y | Y | M  | OR  | 2016 | 14 | -33.439 | 139.101 |
| N44    | Y | Y | N | N | F  | OR  | 2016 | 14 | -33.439 | 139.101 |
| N21    | Y | N | Y | Y | M  | OR  | 2015 | 14 | -33.411 | 139.111 |
| N40    | Y | Y | Y | Y | M  | OR  | 2015 | 14 | -33.411 | 139.111 |
| N25    | Y | Y | Y | Y | M  | OR  | 2015 | 14 | -33.410 | 139.095 |
| N24    | N | N | Y | Y | M  | OR  | 2015 | 14 | -33.410 | 139.096 |
| N29    | N | N | Y | Y | M  | OR  | 2015 | 14 | -33.411 | 139.112 |
| N39    | N | N | Y | Y | M  | OR  | 2015 | 14 | -33.411 | 139.111 |
| N26    | N | N | Y | Y | M  | OR  | 2015 | 14 | -33.411 | 139.102 |
| N22    | N | N | Y | Y | M  | OR  | 2015 | 14 | -33.411 | 139.103 |
| N23    | N | N | Y | Y | M  | OR  | 2015 | 14 | -33.412 | 139.098 |
| N37    | N | N | Y | Y | M  | OR  | 2015 | 14 | -33.442 | 139.101 |
| N31    | N | N | Y | Y | M  | OR  | 2015 | 14 | -33.442 | 139.107 |
| N38    | N | N | Y | Y | M  | OR  | 2015 | 14 | -33.444 | 139.103 |
| R58759 | N | Y | N | N | M  | OR  | 2004 | 14 | -33.434 | 139.079 |
| R53529 | N | Y | N | N | NA | OR  | 1999 | 14 | -33.345 | 139.261 |
| R41362 | Y | N | N | N | NA | OR  | 1992 | NA | -33.350 | 139.103 |
| R56417 | Y | N | N | N | NA | OR  | 2001 | NA | -33.234 | 138.250 |
| R41167 | Y | N | N | N | M  | OR  | 1992 | NA | -33.200 | 139.619 |
| R41638 | Y | N | N | N | F  | OR  | 1992 | NA | -33.124 | 139.196 |
| R41771 | Y | N | N | N | NA | OR  | 1992 | NA | -33.061 | 139.831 |
| BS377  | Y | N | N | N | F  | OR  | 2011 | NA | -32.095 | 140.274 |
| BS378  | Y | N | N | N | M  | OR  | 2011 | NA | -32.095 | 140.274 |
| BS379  | Y | N | N | N | M  | OR  | 2011 | NA | -32.094 | 140.274 |
| R60607 | Y | N | N | N | F  | OR  | 2005 | NA | -32.067 | 140.333 |
| BS398  | Y | N | N | N | M  | OR  | 2011 | NA | -31.981 | 140.208 |
| BS400  | Y | N | N | N | F  | OR  | 2011 | NA | -31.981 | 140.210 |
| TG02   | Y | N | N | N | M  | SFR | 2015 | NA | -       | -       |
| TGG1   | Y | N | N | N | M  | SFR | 2015 | NA | -       | -       |
| TGO1   | Y | N | N | N | M  | SFR | 2015 | NA | -       | -       |
| TGOY1  | Y | N | N | N | M  | SFR | 2015 | NA | -       | -       |
| TGY1   | Y | N | N | N | M  | SFR | 2015 | NA | -       | -       |
| TG_F8  | Y | N | N | N | F  | SFR | 2010 | NA | -       | -       |
| R31224 | Y | N | N | N | NA | SFR | 1987 | NA | -32.867 | 139.933 |
| MR595  | Y | N | N | N | M  | SFR | 2012 | NA | -32.843 | 138.053 |
| MR588  | Y | N | N | N | M  | SFR | 2012 | NA | -32.842 | 138.057 |
| MR590  | Y | N | N | N | M  | SFR | 2012 | NA | -32.842 | 138.057 |

|        |   |   |   |   |    |     |      |    |         |         |
|--------|---|---|---|---|----|-----|------|----|---------|---------|
| MR591  | Y | N | N | N | M  | SFR | 2012 | NA | -32.842 | 138.057 |
| AG63   | Y | N | N | N | F  | SFR | 2010 | NA | -32.745 | 138.073 |
| R41137 | Y | N | N | N | NA | SFR | 1992 | NA | -32.592 | 139.861 |
| DP88   | Y | N | N | N | M  | SFR | 2010 | NA | -32.416 | 137.993 |
| DS141  | Y | N | N | N | F  | SFR | 2010 | NA | -32.310 | 137.980 |
| WG136  | Y | N | N | N | F  | SFR | 2010 | NA | -32.188 | 138.011 |
| WG143  | Y | N | N | N | M  | SFR | 2010 | NA | -32.188 | 138.010 |
| WG166  | Y | N | N | N | M  | SFR | 2010 | NA | -32.188 | 138.009 |
| WG80   | Y | N | N | N | M  | SFR | 2010 | NA | -32.188 | 138.009 |
| WG135  | Y | N | N | N | F  | SFR | 2010 | NA | -32.188 | 138.011 |
| WG146  | Y | N | N | N | M  | SFR | 2010 | NA | -32.187 | 138.008 |
| WG145  | Y | N | N | N | M  | SFR | 2010 | NA | -32.186 | 138.008 |
| YC58   | Y | N | N | N | NA | SFR | 2010 | NA | -31.958 | 138.377 |
| YC59   | Y | N | N | N | M  | SFR | 2010 | NA | -31.958 | 138.377 |
| YC60   | Y | N | N | N | M  | SFR | 2010 | NA | -31.956 | 138.372 |
| YC127  | Y | N | N | N | M  | SFR | 2010 | NA | -31.956 | 138.372 |
| YC93   | Y | N | N | N | M  | SFR | 2010 | NA | -31.956 | 138.372 |
| YC110  | Y | N | N | N | M  | SFR | 2010 | NA | -31.954 | 138.375 |
| YC104  | Y | N | N | N | M  | SFR | 2010 | NA | -31.953 | 138.374 |
| YC105  | Y | N | N | N | F  | SFR | 2010 | NA | -31.953 | 138.374 |
| R57145 | Y | N | N | N | M  | SFR | -    | NA | -31.938 | 138.105 |
| R60917 | Y | N | N | N | NA | SFR | 2005 | NA | -31.625 | 138.594 |
| W_M31  | Y | N | N | N | M  | SFR | 2010 | NA | -31.546 | 138.603 |
| W_M23  | Y | N | N | N | M  | SFR | 2010 | NA | -31.538 | 138.599 |
| W_M22  | Y | N | N | N | M  | SFR | 2010 | NA | -31.538 | 138.599 |
| BG51   | Y | N | N | N | M  | SFR | 2010 | NA | -31.418 | 138.558 |
| R52282 | Y | N | N | N | NA | SFR | 1999 | NA | -31.395 | 138.811 |
| A535   | Y | N | N | N | M  | SFR | 2012 | NA | -31.281 | 138.582 |
| A529   | Y | N | N | N | M  | SFR | 2012 | NA | -31.280 | 138.583 |
| A504   | Y | N | N | N | M  | SFR | 2012 | NA | -31.280 | 138.584 |
| A510   | Y | N | N | N | F  | SFR | 2012 | NA | -31.279 | 138.591 |
| A518   | Y | N | N | N | M  | SFR | 2012 | NA | -31.279 | 138.593 |
| A47    | Y | N | N | N | M  | SFR | 2010 | NA | -31.277 | 138.599 |
| R52684 | Y | N | N | N | NA | NFR | 1999 | NA | -30.768 | 138.707 |
| R51819 | Y | N | N | N | M  | NFR | 1998 | NA | -30.611 | 138.803 |
| R52317 | Y | N | N | N | NA | NFR | 1999 | NA | -30.598 | 139.133 |
| R52909 | Y | N | N | N | NA | NFR | 1999 | NA | -30.428 | 139.145 |
| R31653 | Y | N | N | N | NA | NFR | 1987 | NA | -30.267 | 139.283 |
| R51794 | Y | N | N | N | NA | NFR | 1998 | NA | -30.198 | 139.233 |
| R52948 | Y | N | N | N | M  | NFR | 1999 | NA | -30.121 | 139.399 |



**Table S2.** Sampling sites along a north-south linear transect through the *C. decresii* contact zone. Distance is kilometres (km) from southernmost site 1. Variation (mean  $\pm$  SD) and samples numbers ( $N$ ) for each trait: hybrid index ( $H_{\text{Index}}$ ; Bayesian  $q$ -value), mtDNA haplotype, quantum catch of the ultraviolet wavelength sensitive receptor ( $QC_{\text{UVS}}$ ), PC1 scores for throat coloration ( $T_{\text{PC1}}$ ) and dorsolateral phenotype ( $D_{\text{PC1}}$ ).

| Ancestry | Site | Dist. | $H_{\text{Index}}$ | $N$ | mtDNA | $N$ | $QC_{\text{UVS}}$ | $T_{\text{PC1}}$ | $N$ | $D_{\text{PC1}}$ | $N$ |
|----------|------|-------|--------------------|-----|-------|-----|-------------------|------------------|-----|------------------|-----|
| South    | 1    | 0     | $0.98 \pm 0.06$    | 10  | 1.0   | 10  | $0.65 \pm 0.21$   | $0.86 \pm 0.08$  | 22  | $1.65 \pm 0.83$  | 32  |
| South    | 2    | 14    | $0.95 \pm 0.13$    | 11  | 1.0   | 1   | $0.53 \pm 0.14$   | $0.76 \pm 0.11$  | 19  | $1.89 \pm 0.90$  | 21  |
| Admixed  | 3    | 28    | $0.44 \pm 0.04$    | 11  | 0.18  | 6   | $0.14 \pm 0.11$   | $0.30 \pm 0.22$  | 15  | $-0.12 \pm 0.51$ | 18  |
| Admixed  | 4    | 31    | $0.40 \pm 0.05$    | 31  | 0.0   | 10  | $0.22 \pm 0.16$   | $0.48 \pm 0.19$  | 37  | $-0.19 \pm 0.80$ | 51  |
| Admixed  | 5    | 35.5  | $0.33 \pm 0.06$    | 10  | 0.0   | 6   | $0.08 \pm 0.06$   | $0.24 \pm 0.21$  | 11  | $-0.79 \pm 0.62$ | 11  |
| Admixed  | 6    | 39.5  | $0.24 \pm 0.04$    | 12  | 0.0   | 3   | $0.19 \pm 0.12$   | $0.43 \pm 0.23$  | 19  | $-0.22 \pm 0.60$ | 19  |
| Admixed  | 7    | 45.5  | $0.16 \pm 0.03$    | 9   | 0.0   | 1   | $0.09 \pm 0.08$   | $0.23 \pm 0.27$  | 6   | $-0.39 \pm 0.54$ | 6   |
| Admixed  | 8    | 50.5  | $0.16 \pm 0.05$    | 7   | 0.0   | 4   | $0.09 \pm 0.03$   | $0.14 \pm 0.01$  | 2   | $-0.92 \pm 0.56$ | 2   |
| North    | 9    | 58    | $0.09 \pm 0.01$    | 16  | 0.0   | 5   | $0.18 \pm 0.14$   | $0.35 \pm 0.21$  | 24  | $-0.59 \pm 0.55$ | 24  |
| North    | 10   | 71    | $0.05 \pm 0.01$    | 2   | 0.0   | 1   | $0.10 \pm 0.04$   | $0.46 \pm 0.09$  | 3   | $-0.89 \pm 0.58$ | 3   |
| North    | 11   | 81    | $0.04 \pm 0.02$    | 9   | 0.0   | 4   | $0.18 \pm 0.14$   | $0.42 \pm 0.12$  | 10  | $-0.89 \pm 0.56$ | 10  |
| North    | 12   | 94    | $0.02 \pm 0.02$    | 8   | 0.0   | 9   | $0.28 \pm 0.03$   | $0.53 \pm 0.02$  | 4   | $-1.18 \pm 0.43$ | 4   |
| North    | 13   | 140   | $0.004 \pm 0.02$   | 6   | 0.0   | 8   | $0.20 \pm 0.12$   | $0.35 \pm 0.22$  | 13  | $-0.70 \pm 0.57$ | 13  |
| North    | 14   | 160   | $0.004 \pm 0.003$  | 7   | 0.0   | 6   | $0.20 \pm 0.14$   | $0.50 \pm 0.18$  | 19  | $-1.28 \pm 0.36$ | 19  |
| Total    |      |       |                    | 149 | -     | 74  | -                 | -                | 204 | -                | 233 |

**Table S3.** STRUCTURE results summarised in STRUCTUREHARVESTER using the Evanno method for the full dataset of 1333 loci. The selected value of K (number of populations) is denoted with an asterisk.

| K  | Reps | Mean LnP(K) | Stdev LnP(K) | Ln'(K)   | Ln''(K)  | Delta K  |
|----|------|-------------|--------------|----------|----------|----------|
| 1  | 10   | -96935.67   | 0.590361     | —        | —        | —        |
| 2* | 10   | -85534.28   | 4.320        | 11401.39 | 8426.593 | 1950.583 |
| 3  | 10   | -82559.483  | 9.957        | 2974.797 | 2381.325 | 164.040  |
| 4  | 10   | -81973.575  | 837.453      | 589.69   | 631.141  | 0.754    |
| 5  | 10   | -80752.744  | 369.785      | 1220.831 | —        | —        |

**Table S4.** Pairwise  $F_{ST}$  values between populations [Northern Flinders Ranges (NFR), Southern Flinders Ranges (SFR), Olary Ranges (OR), Contact Zone (CZ), Mainland South (MS), and Kangaroo Island (KI)]. All values are significant at  $P < 0.001$ .

|     | NFR   | SFR   | OR    | CZ    | MS    | KI |
|-----|-------|-------|-------|-------|-------|----|
| NFR | -     | -     | -     | -     | -     | -  |
| SFR | 0.173 | -     | -     | -     | -     | -  |
| OR  | 0.211 | 0.027 | -     | -     | -     | -  |
| CZ  | 0.216 | 0.089 | 0.058 | -     | -     | -  |
| MS  | 0.468 | 0.374 | 0.355 | 0.203 | -     | -  |
| KI  | 0.571 | 0.434 | 0.293 | 0.293 | 0.213 | -  |

**Table S5.** Results of throat and dorsolateral phenotype analyses on wild-caught males and captive-bred offspring (both sexes for throat and only males for dorsolateral). Contributions of variables to components in principal component analyses (PC1, PC2), linear discriminant analyses (LD1, LD2) analyses, and results of a *t*-test (*T*, *P*) between northern and southern lineages. Throat variables are the proportions of orange, yellow, and blue colours on the throat, and the quantum catch of the UV receptor (QC<sub>UVS</sub>). Dorsolateral variables are the proportions of orange and yellow colours on dorsal surface, and the number of distinct breaks in the lateral stripe at the neck.

|              | Population   | Variable          | PC1   | PC2   | LD1   | LD2   | <i>T</i> | <i>P</i> |
|--------------|--------------|-------------------|-------|-------|-------|-------|----------|----------|
| Throat       | Wild-Caught  | Orange            | 54.56 | 0.82  | 0.32  | -0.82 | -5.77    | <0.001   |
|              |              | Yellow            | 9.54  | 69.77 | 0.09  | -0.06 | -1.49    | 0.137    |
|              |              | Blue              | 35.9  | 29.41 | 2.36  | -0.78 | 23.56    | <0.001   |
|              |              | QC <sub>UVS</sub> | -     | -     | 0.62  | 0.6   | 9.34     | <0.001   |
|              | Captive-Bred | Orange            | -     | -     | -0.09 | -0.5  | -4.26    | <0.001   |
|              |              | Yellow            | -     | -     | -0.54 | -0.82 | -5.69    | <0.001   |
|              |              | Blue              | -     | -     | 0.59  | -0.82 | 2.27     | 0.04     |
|              |              | QC <sub>UVS</sub> | -     | -     | 1.15  | -0.39 | 8.82     | <0.001   |
| Dorsolateral | Wild-Caught  | Orange            | 50.06 | 0.78  | 0.65  | -0.12 | -8.75    | <0.001   |
|              |              | Yellow            | 0.01  | 98.21 | 0.11  | 1.13  | -3.87    | <0.001   |
|              |              | LS Breaks         | 49.94 | 1.01  | 1.38  | 0.04  | -30.19   | <0.001   |
|              | Captive-Bred | Orange            | -     | -     | -0.29 | -1.1  | 0.81     | 0.44     |
|              |              | Yellow            | -     | -     | -0.34 | 0.57  | 2.53     | 0.04     |
|              |              | LS Breaks         | -     | -     | -1.3  | 0.1   | 19.45    | <0.001   |

**Table S6.** Parameter estimates for 95% confidence sets (cumulative Akaike weight  $w_i \leq 0.95$ ) of best-ranked cline models fitted using *HZAR* for the hybrid index based on 1333 loci ( $H_{\text{index}}$ ), mtDNA haplotype frequencies (mtDNA), PC1 for dorsolateral phenotype ( $D_{\text{PC1}}$ ), quantum catch of the UV wavelength sensitive receptor ( $Q_{\text{UVS}}$ ), and PC1 for throat coloration ( $T_{\text{PC1}}$ ). Cline centre ( $c$ ) is the distance (km) from the southern-most sampling site, width ( $w$ ) is 1/slope,  $p_{\text{min}}$  and  $p_{\text{max}}$  are frequencies at cline ends (for genetic loci),  $\mu_R$  and  $\mu_L$  are mean trait values at cline ends (for quantitative traits),  $\delta$  and  $\tau$  are tail parameters (right, left, or mirror; distance from cline centre to tail and tail slope, respectively). Two log-likelihood unit support limits for centre and width are shown as ‘low’ and ‘high’. Akaike weight ( $w_i$ ) shown has been recalculated based on only the 95% confidence set to sum to 1.

| Trait              | Model                                                  | $c$   | $c_{\text{low}}$ | $c_{\text{high}}$ | $w$   | $w_{\text{low}}$ | $w_{\text{high}}$ | $p_{\text{min}} / \mu_R$ | $p_{\text{max}} / \mu_L$ | $\delta_L$ | $\tau_L$ | $\delta_R$ | $\tau_R$ | $\delta_M$ | $\tau_M$ | $\text{AIC}_c$ | $w_i$ |
|--------------------|--------------------------------------------------------|-------|------------------|-------------------|-------|------------------|-------------------|--------------------------|--------------------------|------------|----------|------------|----------|------------|----------|----------------|-------|
| $H_{\text{index}}$ | $p_{\text{min}}/p_{\text{max}}$ observed, no tails     | 29.47 | 23.96            | 33.92             | 38.55 | 24.60            | 62.00             | 0.00                     | 0.98                     | -          | -        | -          | -        | -          | -        | 8.18           | 0.23  |
|                    | $p_{\text{min}}/p_{\text{max}}$ observed, right tail   | 27.74 | 20.09            | 32.12             | 15.65 | 3.45             | 45.15             | 0.00                     | 0.98                     | -          | -        | 0.31       | 0.40     | -          | -        | 8.47           | 0.20  |
|                    | $p_{\text{min}}/p_{\text{max}}$ fixed, no tails        | 29.00 | 23.16            | 33.66             | 42.59 | 29.15            | 66.34             | 0.00                     | 1.00                     | -          | -        | -          | -        | -          | -        | 8.82           | 0.17  |
|                    | $p_{\text{min}}/p_{\text{max}}$ fixed, right tail      | 27.04 | 20.25            | 32.17             | 20.51 | 10.02            | 49.76             | 0.00                     | 1.00                     | -          | -        | 0.97       | 0.48     | -          | -        | 8.93           | 0.16  |
|                    | $p_{\text{min}}/p_{\text{max}}$ fixed, mirror tails    | 28.78 | 24.15            | 32.93             | 32.07 | 4.90             | 57.43             | 0.00                     | 1.00                     | -          | -        | -          | -        | 14.43      | 0.40     | 10.73          | 0.07  |
|                    | $p_{\text{min}}/p_{\text{max}}$ estimated, no tails    | 28.32 | 23.60            | 33.32             | 32.44 | 14.77            | 56.92             | 0.03                     | 1.00                     | -          | -        | -          | -        | -          | -        | 11.07          | 0.05  |
|                    | $p_{\text{min}}/p_{\text{max}}$ observed, mirror tails | 29.45 | 24.49            | 33.40             | 31.63 | 2.13             | 57.06             | 0.00                     | 0.98                     | -          | -        | -          | -        | 15.68      | 0.42     | 11.16          | 0.05  |
|                    | $p_{\text{min}}/p_{\text{max}}$ observed, left tail    | 29.49 | 23.95            | 33.92             | 38.46 | 24.61            | 61.93             | 0.00                     | 0.98                     | 133.57     | 0.94     | -          | -        | -          | -        | 12.38          | 0.03  |
|                    | $p_{\text{min}}/p_{\text{max}}$ observed, both tails   | 26.46 | 21.51            | 32.17             | 16.58 | 5.11             | 45.45             | 0.00                     | 0.98                     | 35.23      | 0.44     | 0.31       | 0.42     | -          | -        | 12.87          | 0.02  |
|                    | $p_{\text{min}}/p_{\text{max}}$ estimated, right tail  | 27.16 | 22.46            | 31.99             | 20.02 | 7.81             | 46.24             | 0.01                     | 0.98                     | -          | -        | 0.22       | 0.51     | -          | -        | 13.07          | 0.02  |

|                   | <b>Weighted Average</b>                 | <b>28.41</b> | <b>22.37</b> | <b>33.00</b> | <b>29.77</b> | <b>15.05</b> | <b>55.84</b> | <b>0.00</b>  | <b>0.99</b> | <b>4.52</b> | <b>0.036</b> | <b>0.23</b>  | <b>0.10</b> | <b>1.75</b> | <b>0.05</b> | <b>-</b> | <b>-</b> |
|-------------------|-----------------------------------------|--------------|--------------|--------------|--------------|--------------|--------------|--------------|-------------|-------------|--------------|--------------|-------------|-------------|-------------|----------|----------|
| mtDNA             | <i>pmin/pmax</i> observed, no tails     | 27.70        | 14.75        | 28.17        | 0.80         | 0.02         | 21.88        | 0.00         | 1.00        | -           | -            | -            | -           | -           | -           | 4.17     | 0.29     |
|                   | <i>pmin/pmax</i> fixed, no tails        | 27.96        | 14.76        | 28.12        | 0.11         | 0.07         | 21.80        | 0.00         | 1.00        | -           | -            | -            | -           | -           | -           | 4.17     | 0.29     |
|                   | <i>pmin/pmax</i> fixed, right tail      | 27.60        | 14.29        | 28.15        | 1.03         | 0.17         | 21.79        | 0.00         | 1.00        | -           | -            | 47.72        | 0.81        | -           | -           | 4.17     | 0.29     |
|                   | <i>pmin/pmax</i> observed, right tail   | 27.68        | 13.41        | 28.17        | 0.86         | 0.02         | 21.89        | 0.00         | 1.00        | -           | -            | 103.41       | 0.67        | -           | -           | 8.58     | 0.03     |
|                   | <i>pmin/pmax</i> observed, left tail    | 27.94        | 14.74        | 28.17        | 0.16         | 0.01         | 21.88        | 0.00         | 1.00        | 77.57       | 0.71         | -            | -           | -           | -           | 8.58     | 0.03     |
|                   | <i>pmin/pmax</i> fixed, left tail       | 27.76        | 14.81        | 28.14        | 0.62         | 0.05         | 21.86        | 0.00         | 1.00        | 27.18       | 0.59         | -            | -           | -           | -           | 8.58     | 0.03     |
|                   | <i>pmin/pmax</i> observed, mirror tails | 27.75        | 14.74        | 28.17        | 0.67         | 0.03         | 21.87        | 0.00         | 1.00        | -           | -            | -            | -           | 47.82       | 0.28        | 8.58     | 0.03     |
|                   | <b>Weighted Average</b>                 | <b>27.78</b> | <b>14.59</b> | <b>28.17</b> | <b>0.64</b>  | <b>0.08</b>  | <b>21.85</b> | <b>0.00</b>  | <b>1.0</b>  | <b>3.35</b> | <b>0.04</b>  | <b>17.20</b> | <b>0.26</b> | <b>1.53</b> | <b>0.01</b> | <b>-</b> | <b>-</b> |
| D <sub>PC1</sub>  | mean/variance estimated, right tail     | 22.90        | 16.44        | 27.89        | 6.26         | 0.79         | 19.52        | -1.11        | 1.77        | -           | -            | 0.76         | 0.00        | -           | -           | 502.71   | 0.77     |
|                   | mean/variance estimated, mirror tails   | 23.43        | 15.96        | 26.70        | 39.49        | 0.92         | 60.43        | -1.66        | 2.89        | -           | -            | -            | -           | 9.56        | 0.07        | 505.10   | 0.23     |
|                   | <b>Weighted Average</b>                 | <b>23.02</b> | <b>16.33</b> | <b>27.61</b> | <b>13.97</b> | <b>0.82</b>  | <b>29.02</b> | <b>-1.24</b> | <b>2.03</b> | <b>-</b>    | <b>-</b>     | <b>0.59</b>  | <b>0.00</b> | <b>2.22</b> | <b>0.02</b> | <b>-</b> | <b>-</b> |
| QC <sub>UVS</sub> | mean/variance observed, no tails        | 15.85        | 14.3         | 18.93        | 9.04         | 0.88         | 16.49        | 0.20         | 0.65        | -           | -            | -            | -           | -           | -           | -199.63  | 0.71     |
|                   | mean/variance estimated, no tail        | 16.98        | 14.2         | 25.99        | 10.44        | 0.00         | 21.58        | 0.18         | 0.64        | -           | -            | -            | -           | -           | -           | -195.84  | 0.11     |
|                   | mean/variance observed, left tail       | 15.94        | 14.2         | 27.16        | 5.69         | 0.75         | 16.96        | 0.20         | 0.65        | 0.47        | 0.36         | -            | -           | -           | -           | -195.63  | 0.10     |
|                   | mean/variance observed, mirror tails    | 14.99        | 14.0         | 19.17        | 4.89         | 0.55         | 18.67        | 0.20         | 0.65        | -           | -            | -            | -           | 4.16        | 0.84        | -195.59  | 0.09     |

|                  |                                       |              |              |              |             |             |              |             |             |             |             |   |   |             |             |        |      |
|------------------|---------------------------------------|--------------|--------------|--------------|-------------|-------------|--------------|-------------|-------------|-------------|-------------|---|---|-------------|-------------|--------|------|
|                  | <b>Weighted Average</b>               | <b>15.90</b> | <b>14.25</b> | <b>20.48</b> | <b>8.48</b> | <b>0.74</b> | <b>17.27</b> | <b>0.20</b> | <b>0.65</b> | <b>0.04</b> | <b>0.03</b> | - | - | <b>0.39</b> | <b>0.08</b> | -      | -    |
| T <sub>PC1</sub> | mean/variance<br>estimated, no tails  | 15.21        | 15.1         | 16.11        | 2.75        | 2.51        | 6.58         | 0.40        | 0.85        | -           | -           | - | - | -           | -           | -96.94 | 0.90 |
|                  | mean/variance<br>estimated, left tail | 16.94        | 14.7         | 21.00        | 7.40        | 1.78        | 19.96        | 0.39        | 0.86        | 73.72       | 0.95        | - | - | -           | -           | -92.58 | 0.10 |
|                  | <b>Weighted Average</b>               | <b>15.38</b> | <b>15.06</b> | <b>16.61</b> | <b>3.22</b> | <b>2.43</b> | <b>7.94</b>  | <b>0.40</b> | <b>0.85</b> | <b>7.52</b> | <b>0.10</b> | - | - | -           | -           | -      | -    |

11



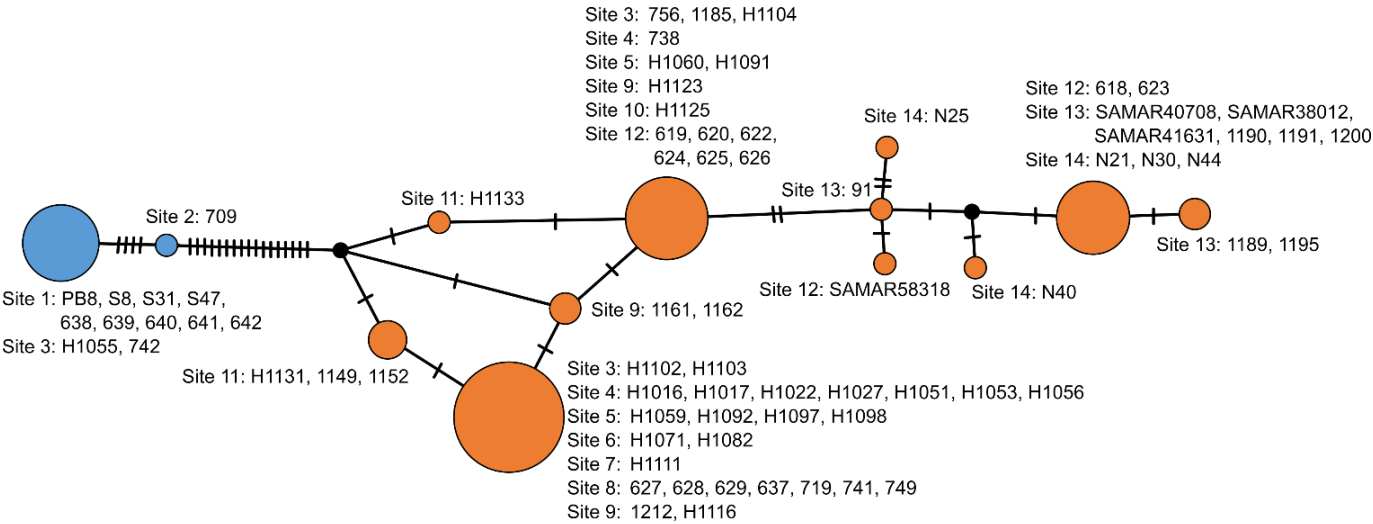

**Figure S1.** TCS parsimony network of *C. decresii* mtDNA haplotypes constructed from the ND4 region. Circle size corresponds to the frequency of haplotypes and each hash indicates one mutational step. Southern lineage haplotypes are coloured blue, northern lineage haplotypes are orange, and hypothetical missing haplotypes are black. Individuals comprising each circle and their geographic origin (cline site) are indicated by adjacent text.

## Supplemental Materials and Methods

### *Captive breeding and offspring rearing*

Adult lizards were housed individually in 55 L x 34 W x 38 D cm opaque plastic enclosures containing a layer of sand and two stacked ceramic tiles for shelter and basking. The room was maintained at temperatures and lighting regimes that mimicked natural seasonal variation. During the breeding season, the ambient temperature was 26°C with a 12:12 light:dark light cycle. A heat lamp was provided in each enclosure to generate a thermal gradient and allow animals to attain their preferred body temperature (36°C; Gibbons, 1977; Walker, unpublished data). Lizards were fed live crickets and mealworms *ad libitum* three times per week and misted with water for hydration.

Our breeding design included four possible combinations (northern female x northern male, northern female x southern male, southern female x southern male, southern female x northern male) with up to three ‘rounds’ of mating to produce multiple clutches in one breeding season. Female enclosures contained a nest box in the form of a clear plastic container 17 x 13 x 15 cm LxWxD with in a 3.5 cm circular entrance in the lower corner, filled with a moist 50:50 sand:peat moss mixture sloped upwards to the top of the box. Eggs were collected following oviposition and incubated in sealed plastic containers filled two-thirds with moist vermiculite (volume ratio 5:1 vermiculite:water) and incubated at 28°C (± 0.12°C) until hatching for a 50:50 sex ratio (Harlow, 2000). Hatchling lizards were housed individually in 30 x 20 x 10 cm plastic enclosures with fly screen lids. Each enclosure contained two stacked ceramic tiles to provide shelter, paper substrate, water dish, heat lamp and UV lighting. Lizards were fed crickets *ad libitum* and misted with water daily.

### *Confirmation of paternity*

Maternity was known for all offspring, however paternity was not known due to multiple mates, and the potential for sperm storage and multiple paternity within clutches in the genus *Ctenophorus* (Hacking, Stuart-Fox, & Gardner, 2017; Lebas, 2001; Olsson, Schwartz, Uller, & Healey, 2007, 2009; Uller, Schwartz, Koglin, & Olsson, 2013). We collected blood from all by venipuncture from the sinus angularis in the corner of the mouth. Genomic DNA was extracted from blood using an E.Z.N.A. Tissue DNA Kit (Omega Bio-tek, Norcross, GA, USA) and sent to the Australian Genome Research Facility (Melbourne, Victoria, AUS) for PCR amplification, fragment visualization and size calling. Paternity was

assigned with a 95% confidence level using a maximum likelihood approach in CERVUS v 3.0.7 (Kalinowski, Taper, & Marshall, 2007; Marshall, Slate, Kruuk, & Pemberton, 1998). First, we conducted a simulation of parentage analysis with the parameters of 50,000 offspring, 1% error rate, 5 candidate fathers, 95% of loci typed, and a minimum of 4 loci typed. Following this, we conducted a paternity analysis based on the trio (mother, father, and offspring) LOD score and a strict 95% confidence level (following Rankin, McLean, Kemp, & Stuart-Fox, 2016). These were manually verified across known breeding pairings.

# *Testosterone-induced throat colour expression*

Crystalline testosterone powder (no. T1500, Sigma) was mixed with sesame oil at a concentration of 0.025 g/mL oil and 4.5 uL of this mixture was pipetted onto the dorsal surface daily for six weeks until throat coloration was apparent (Rankin et al., 2016). Ventral and dorsal photos and spectral measurements of throat coloration were taken weekly.

## References

- Gibbons, J. R. H. (1977). *Comparative ecology and behaviour of lizards of the Amfibolurus decresii species complex*. PhD dissertation. The University of Adelaide.
- Hacking, J., Stuart-Fox, D., & Gardner, M. (2017). Very low rate of multiple paternity detected in clutches of a wild agamid lizard. *Australian Journal of Zoology*, 65(5), 328–334. doi:10.1071/ZO18006
- Harlow, P. S. (2000). Incubation Temperature Determines Hatchling Sex in Australian Rock Dragons (Agamidae: Genus *Ctenophorus*). *Copeia*, 4, 958–964. doi:https://doi.org/10.1643/0045-8511(2000)000[0958:ITDHSI]2.0.CO;2
- Kalinowski, S. T., Taper, M. L., & Marshall, T. C. (2007). Revising how the computer program CERVUS accommodates genotyping error increases success in paternity assignment. *Molecular Ecology*, 16(5), 1099–1106. doi:10.1111/j.1365-294X.2007.03089.x
- Lebas, N. R. (2001). Microsatellite determination of male reproductive success in a natural population of the territorial ornate dragon lizard, *Ctenophorus ornatus*. *Molecular Ecology*, 10(1), 193–203. doi:10.1046/j.1365-294X.2001.01174.x
- Marshall, T. C., Slate, J., Kruuk, L. E. B., & Pemberton, J. M. (1998). Statistical confidence for likelihood-based paternity inference in natural populations. *Molecular Ecology*, 7, 639–655.
- Olsson, M., Schwartz, T., Uller, T., & Healey, M. (2007). Sons are made from old stores: sperm storage effects on sex ratio in a lizard. *Biology Letters*, 3(5), 491–493. doi:10.1098/rsbl.2007.0196

985 Olsson, M., Schwartz, T., Uller, T., & Healey, M. (2009). Effects of sperm storage and male  
 986 colour on probability of paternity in a polychromatic lizard. *Animal Behaviour*, 77(2),  
 987 419–424. doi:10.1016/j.anbehav.2008.10.017

988 Rankin, K. J., McLean, C. A., Kemp, D. J., & Stuart-Fox, D. (2016). The genetic basis of  
 989 discrete and quantitative colour variation in the polymorphic lizard, *Ctenophorus*  
 990 *decrepii*. *BMC Evolutionary Biology*, 16(1), 1–14. doi:10.1186/s12862-016-0757-2

991 Uller, T., Schwartz, T., Koglin, T., & Olsson, M. (2013). Sperm storage and sperm  
 992 competition across ovarian cycles in the dragon lizard, *Ctenophorus fordi*. *Journal of*  
 993 *Experimental Zoology*, 319A, 404–408. doi:10.1002/jez.1803

994
